# Supplementary material for: Genome-Wide Identification, Evolution, and Transcriptional Profiling ofPP2CGene Family inBrassica rapa
Source: Hindawi journal article supplement (doi:10.1155/2019/2965035), 2019-04-03

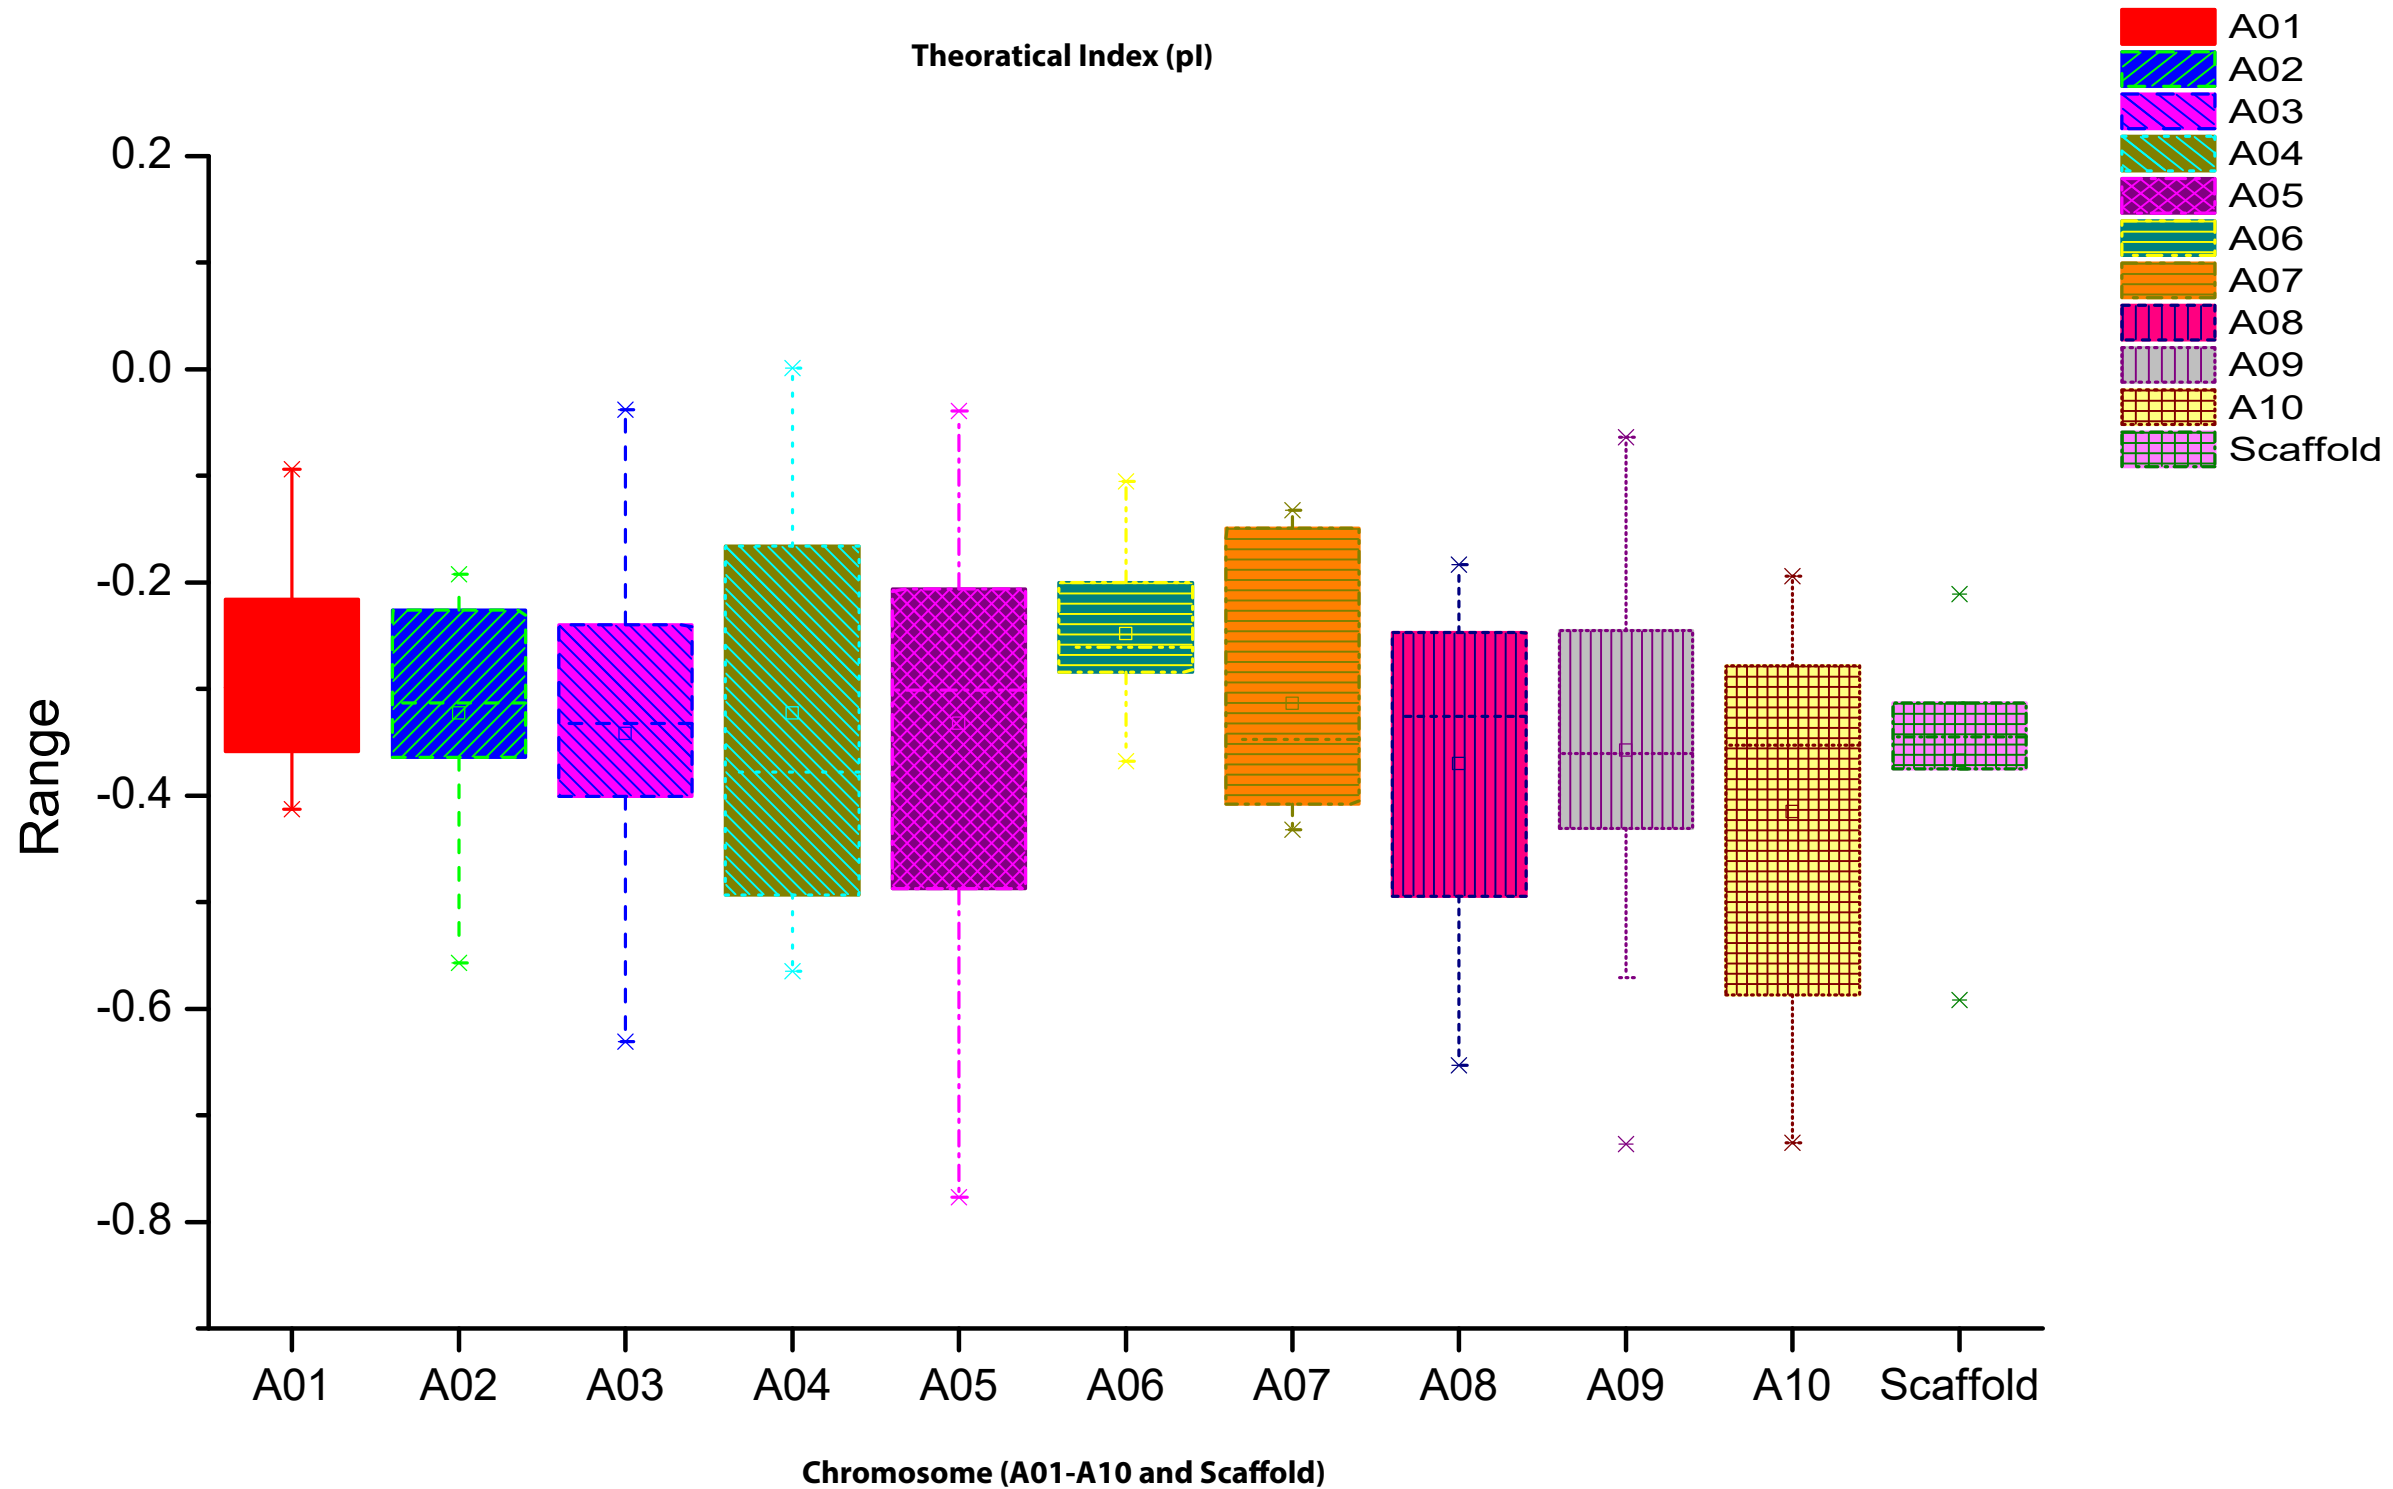

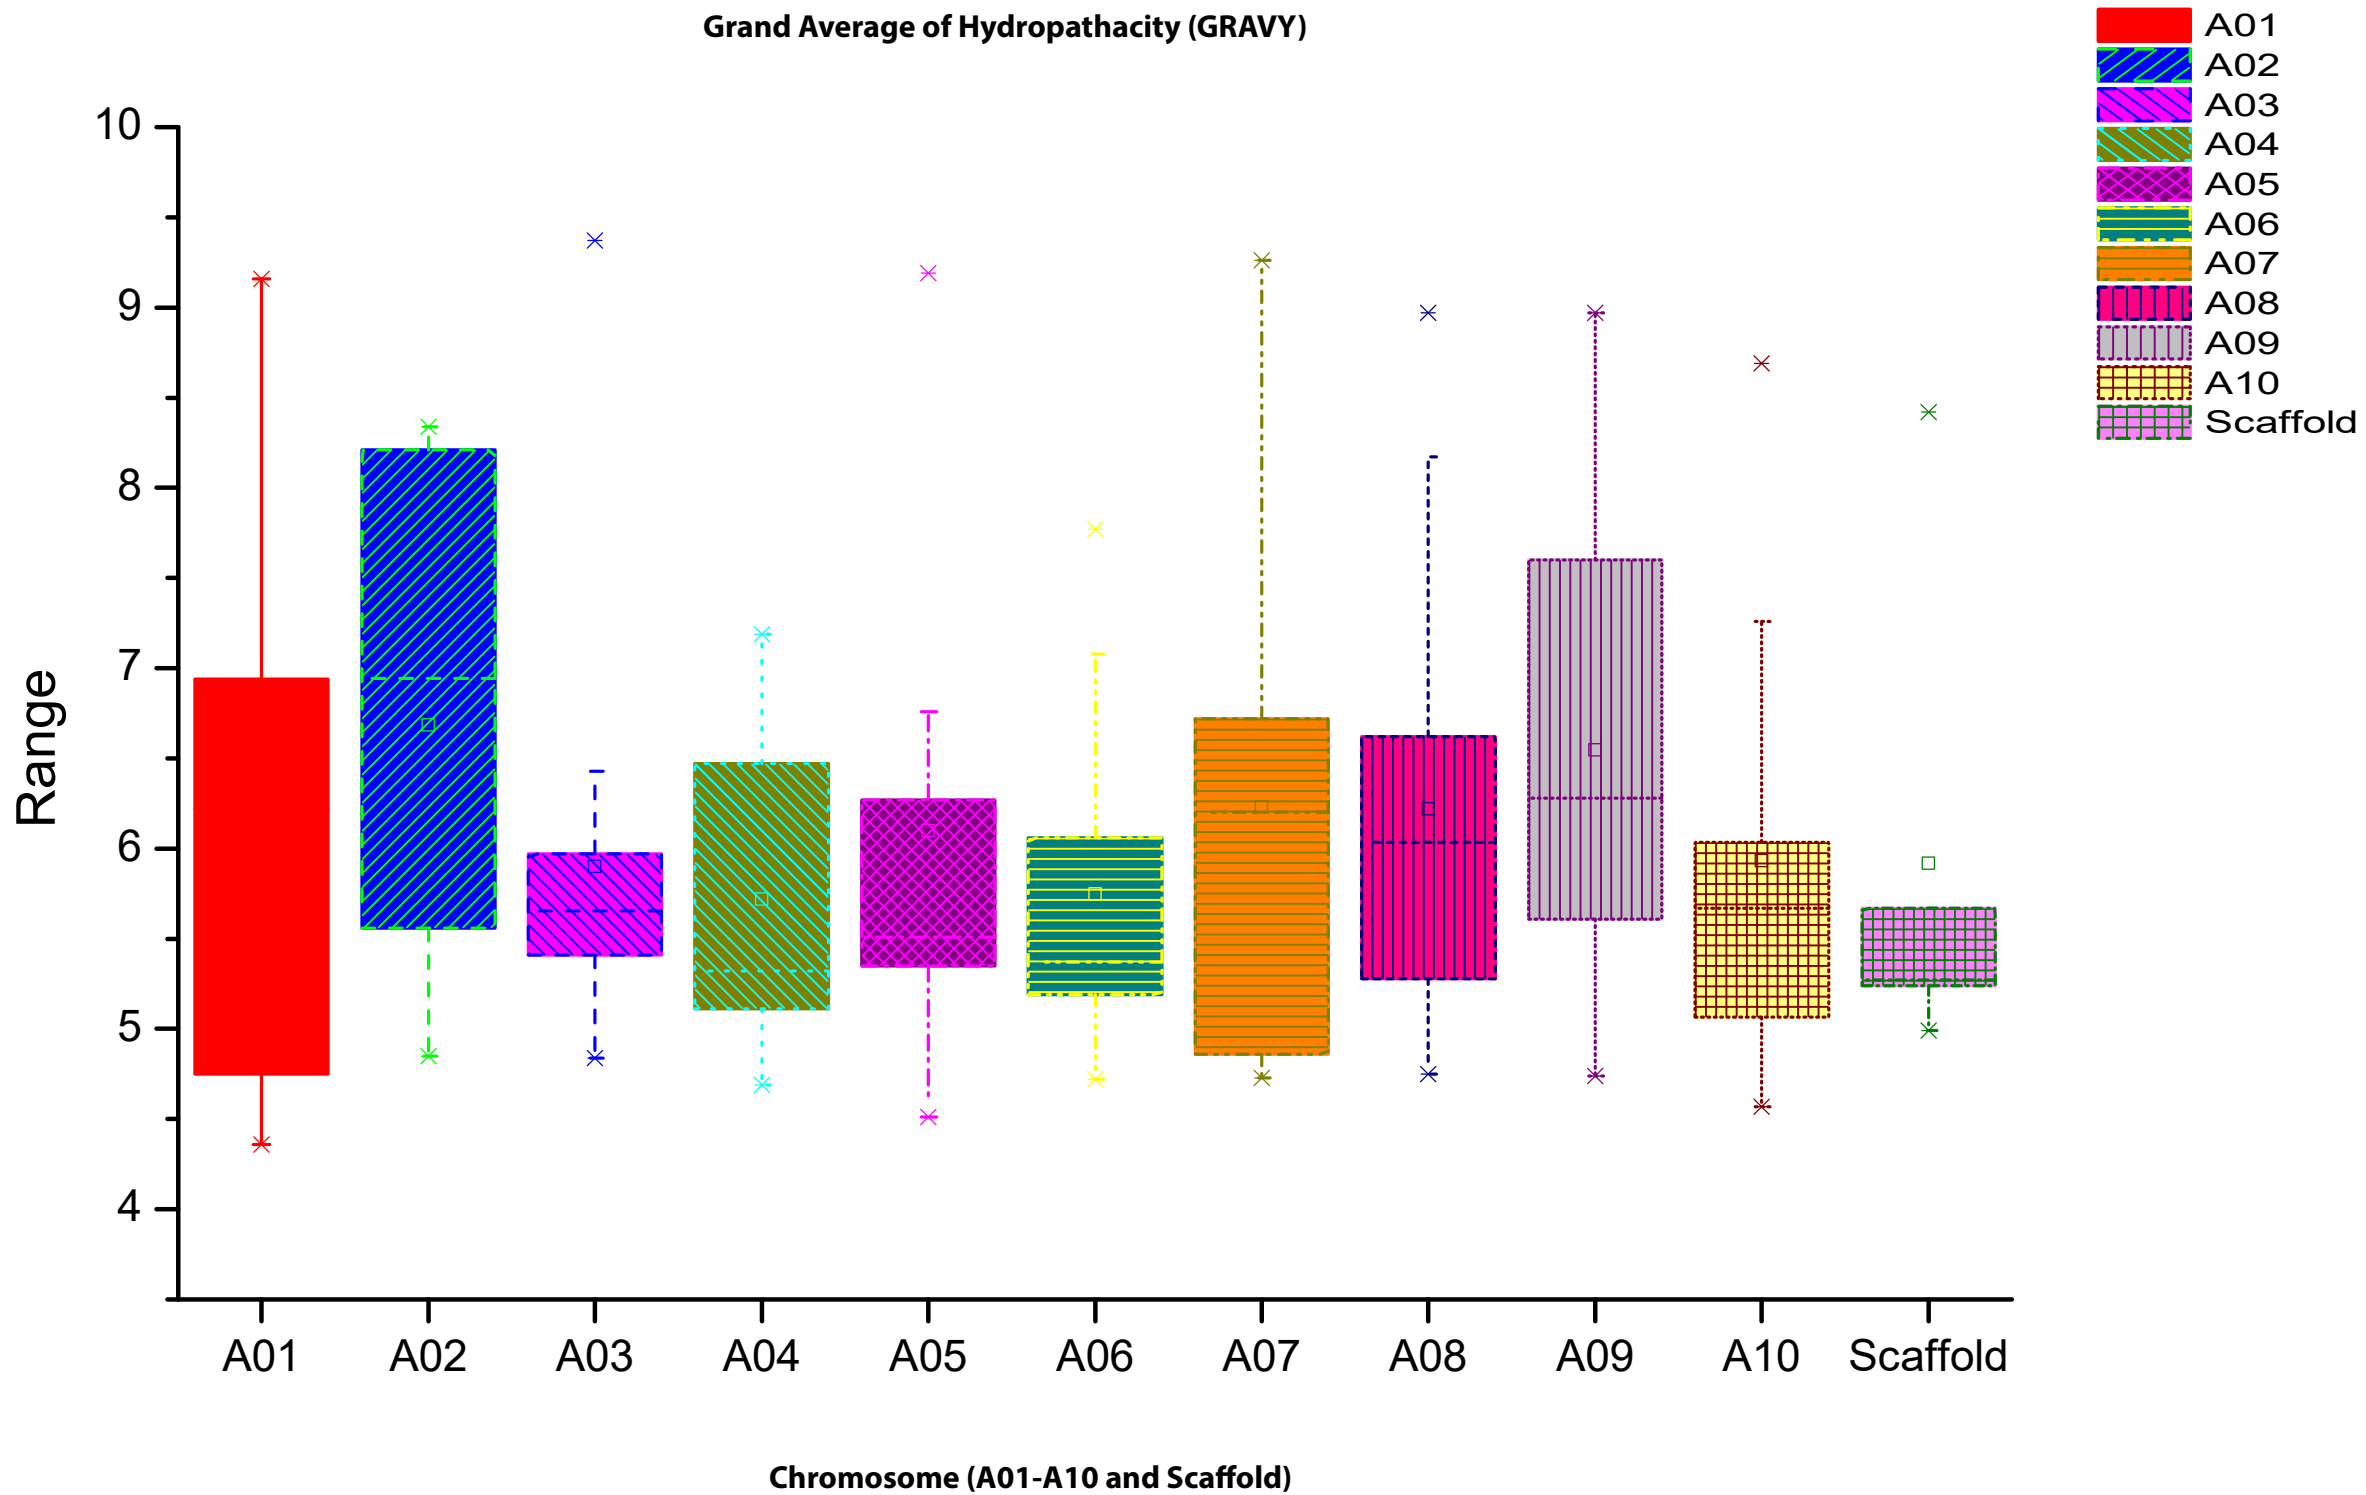

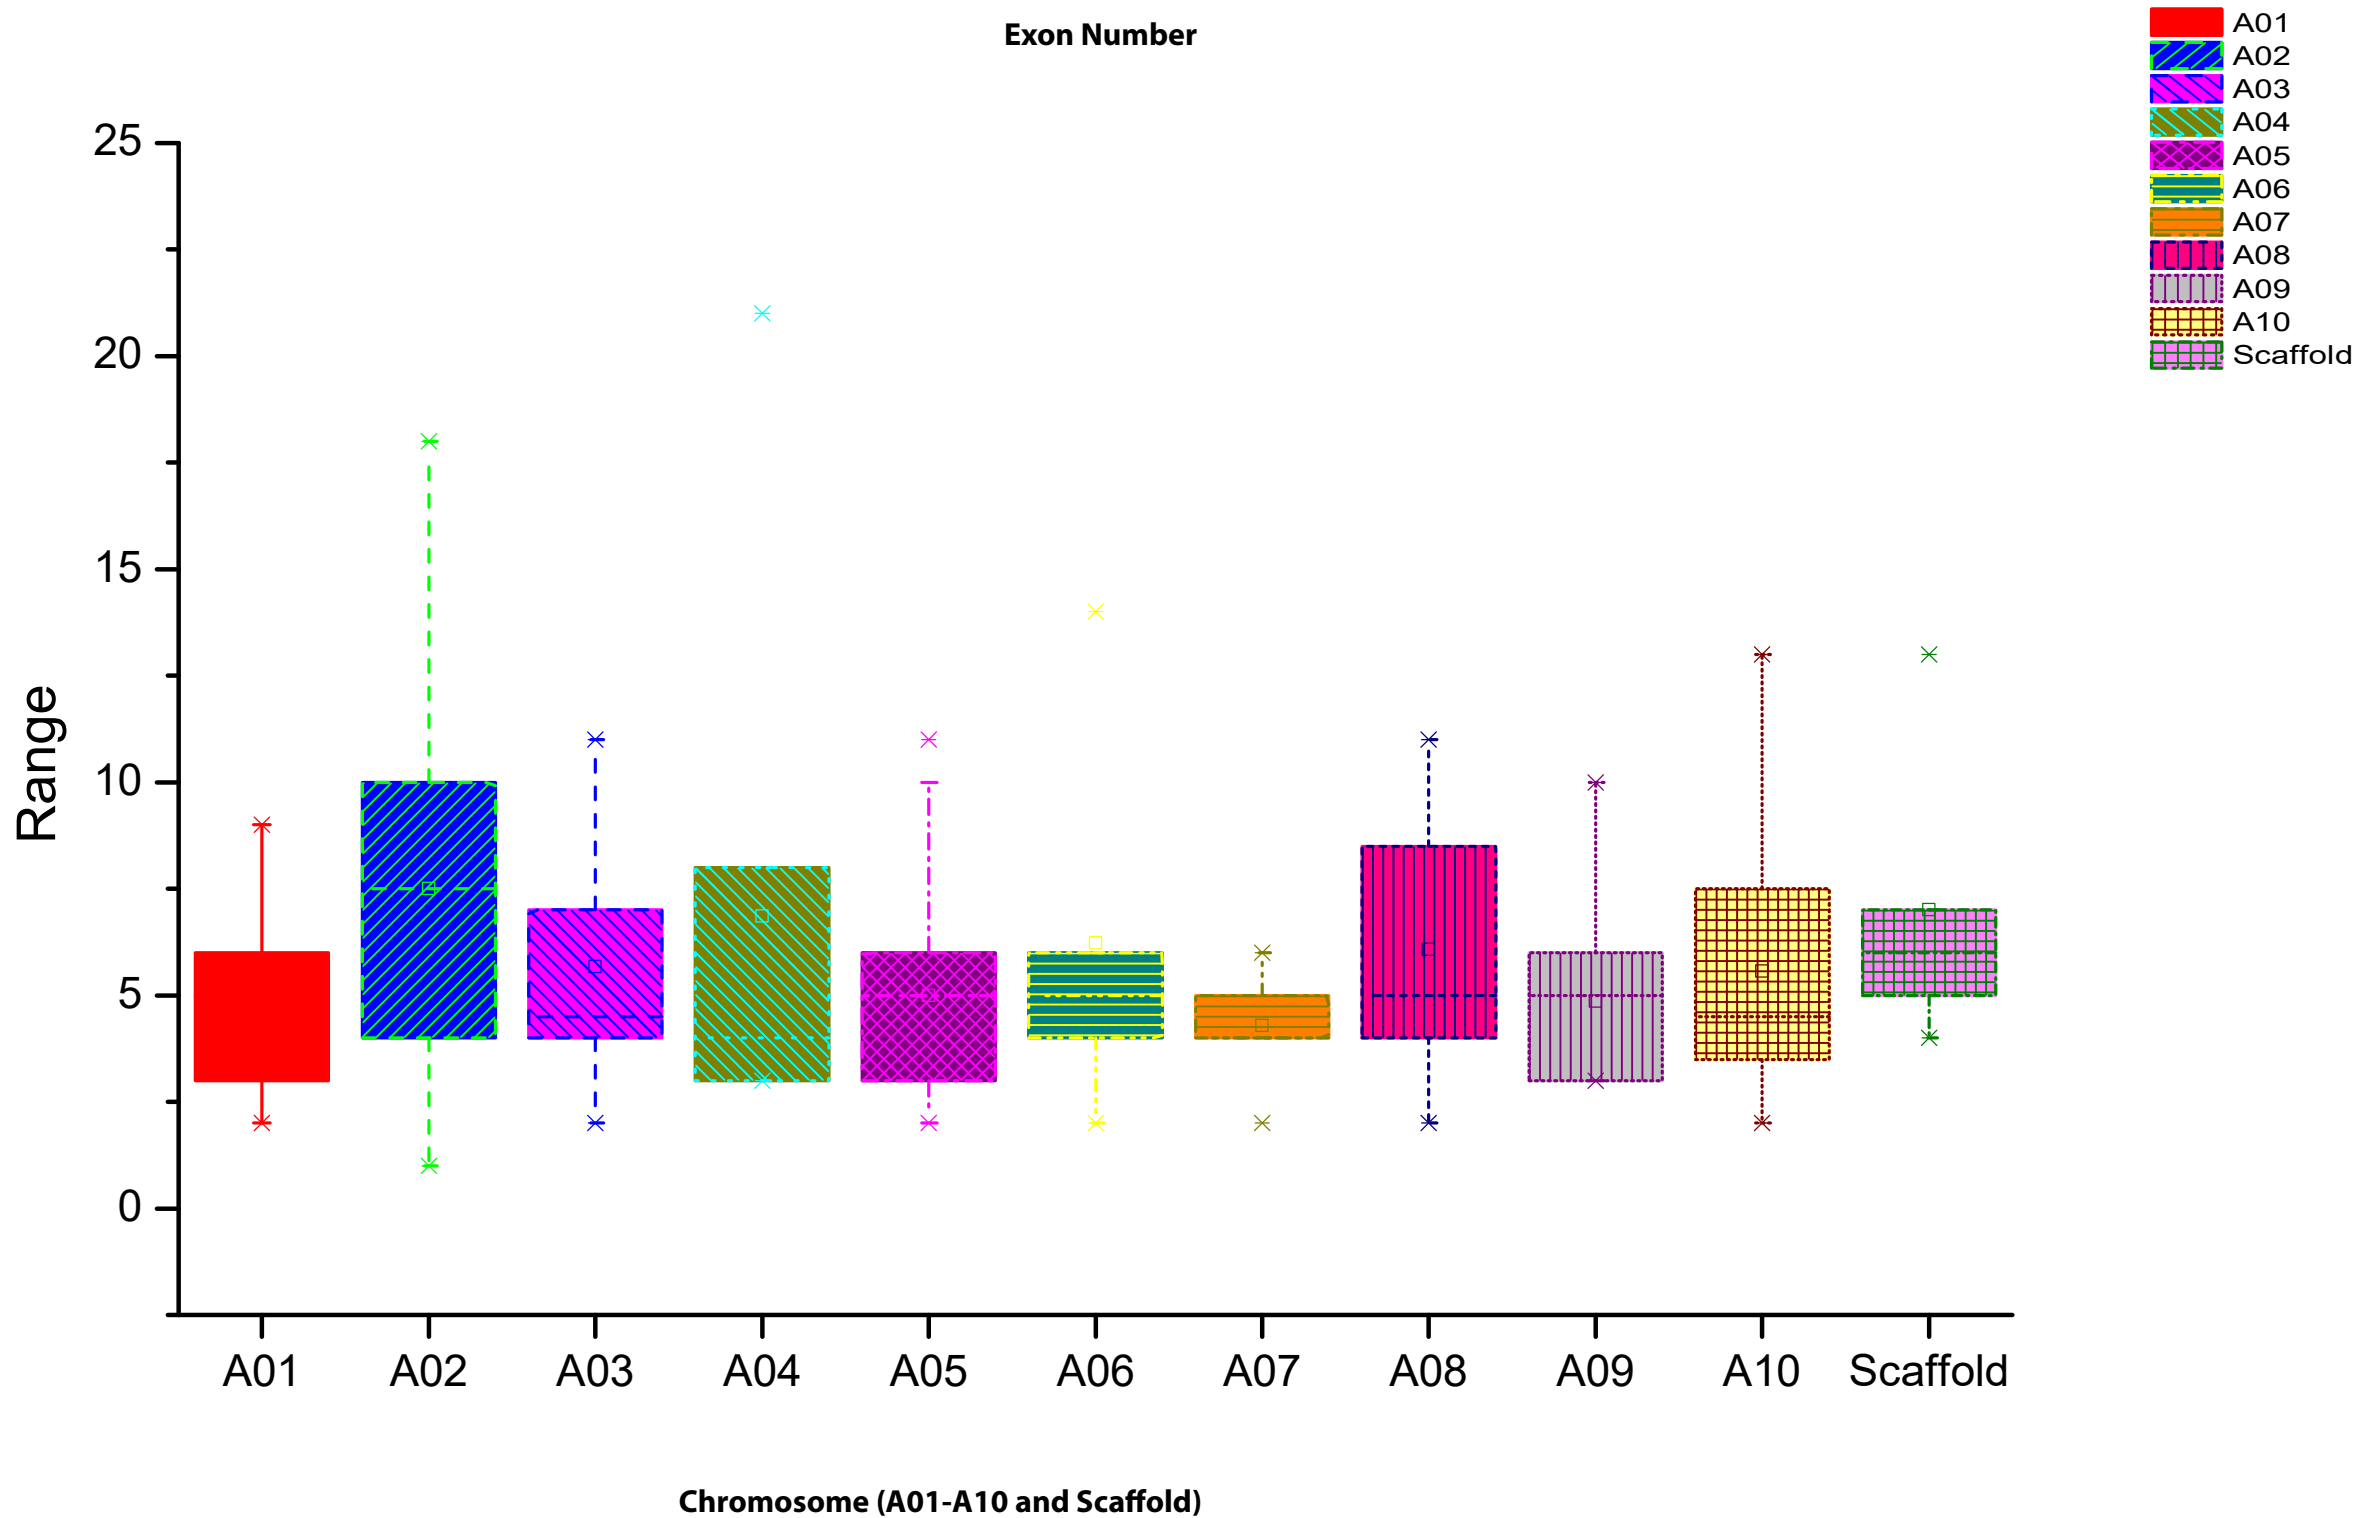

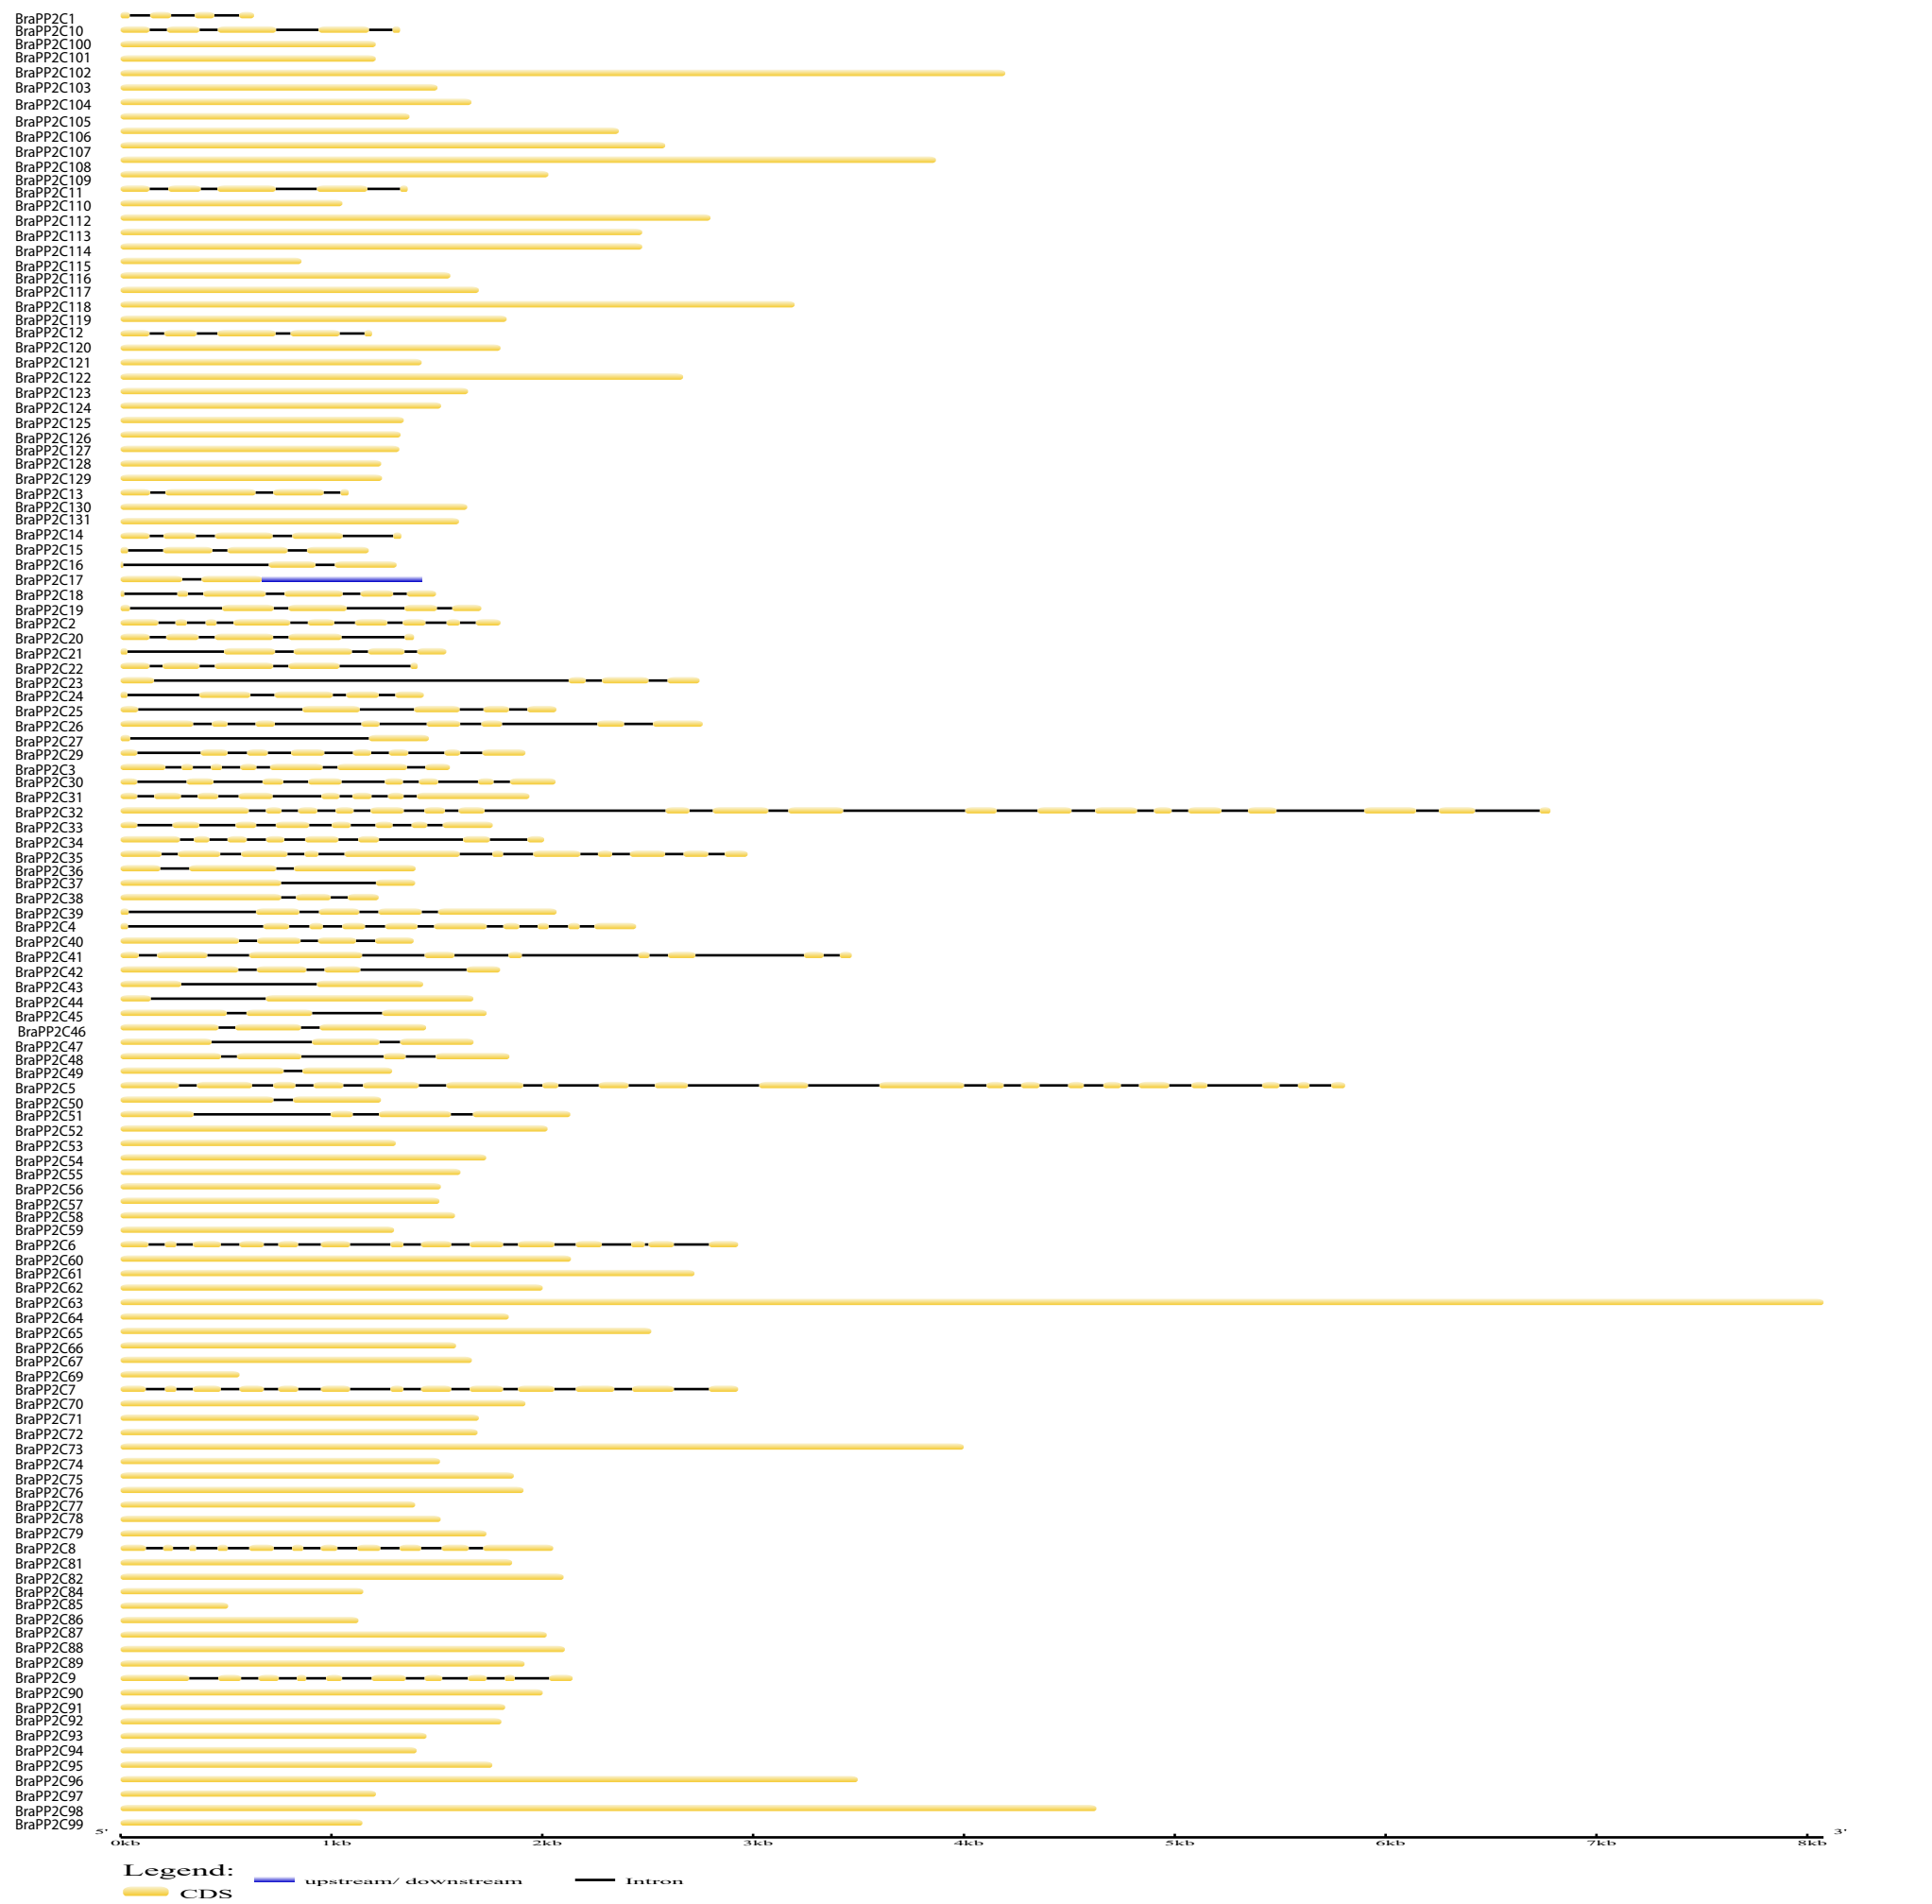



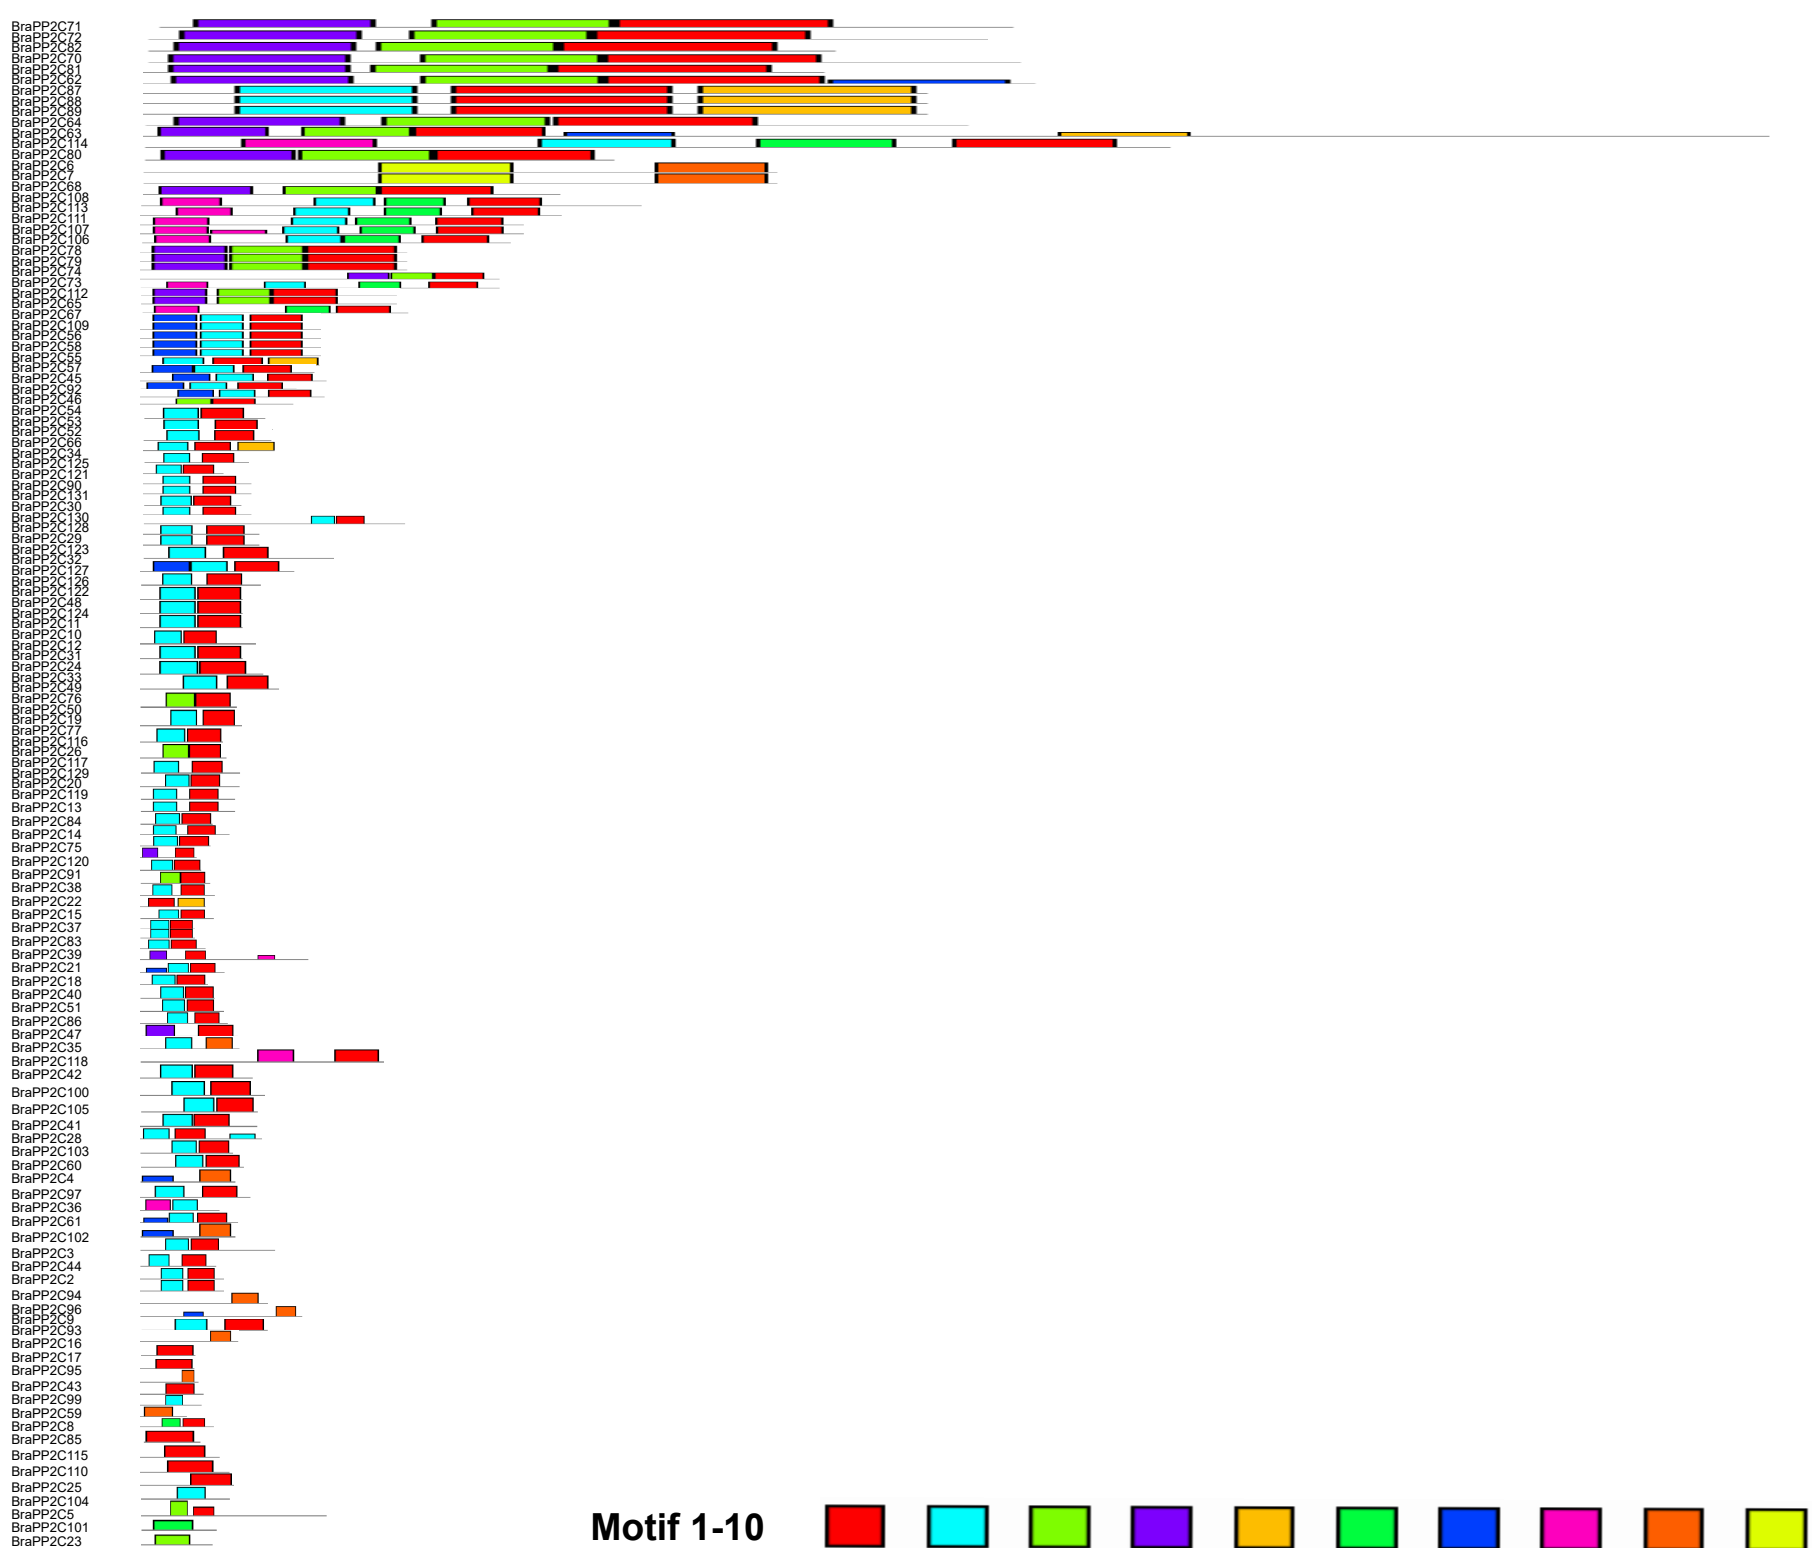

# Consensus Sequences

Length (aa)

Motif 1

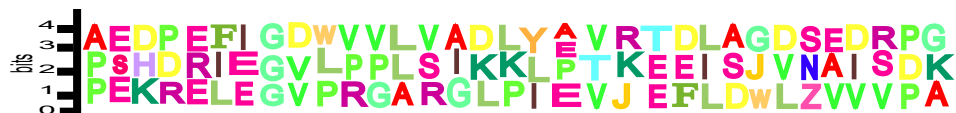

100

Motif 2

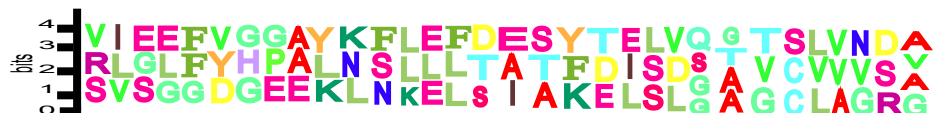

100

Motif 3

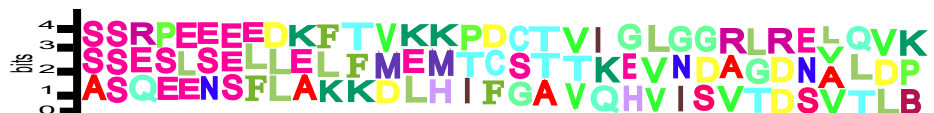

100

Motif 4

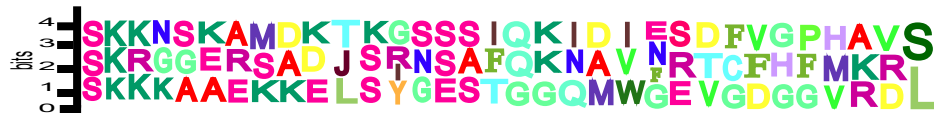

100

Motif 5

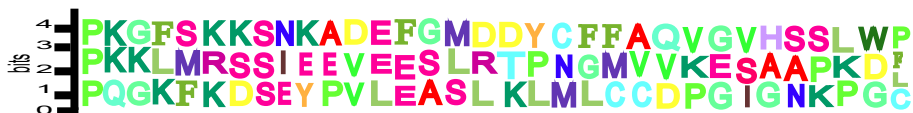

100

Motif 6

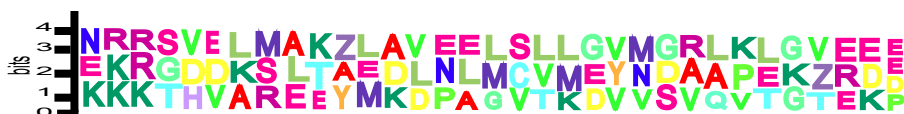

100

Motif 7

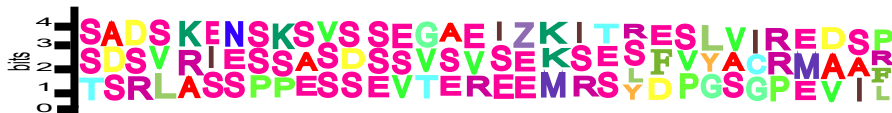

100

Motif 8

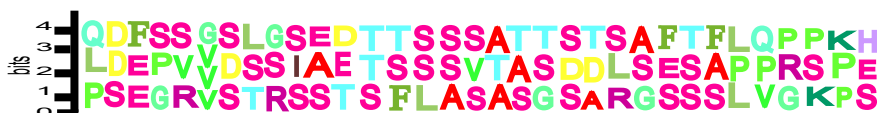

100

Motif 9

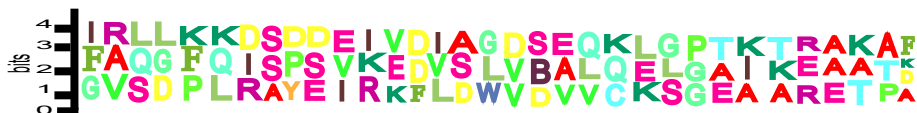

100

Motif 10

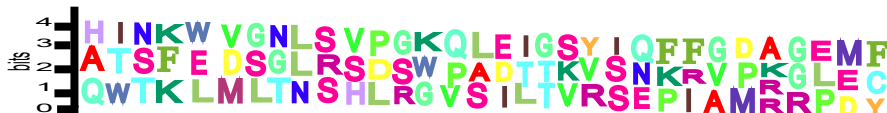

100

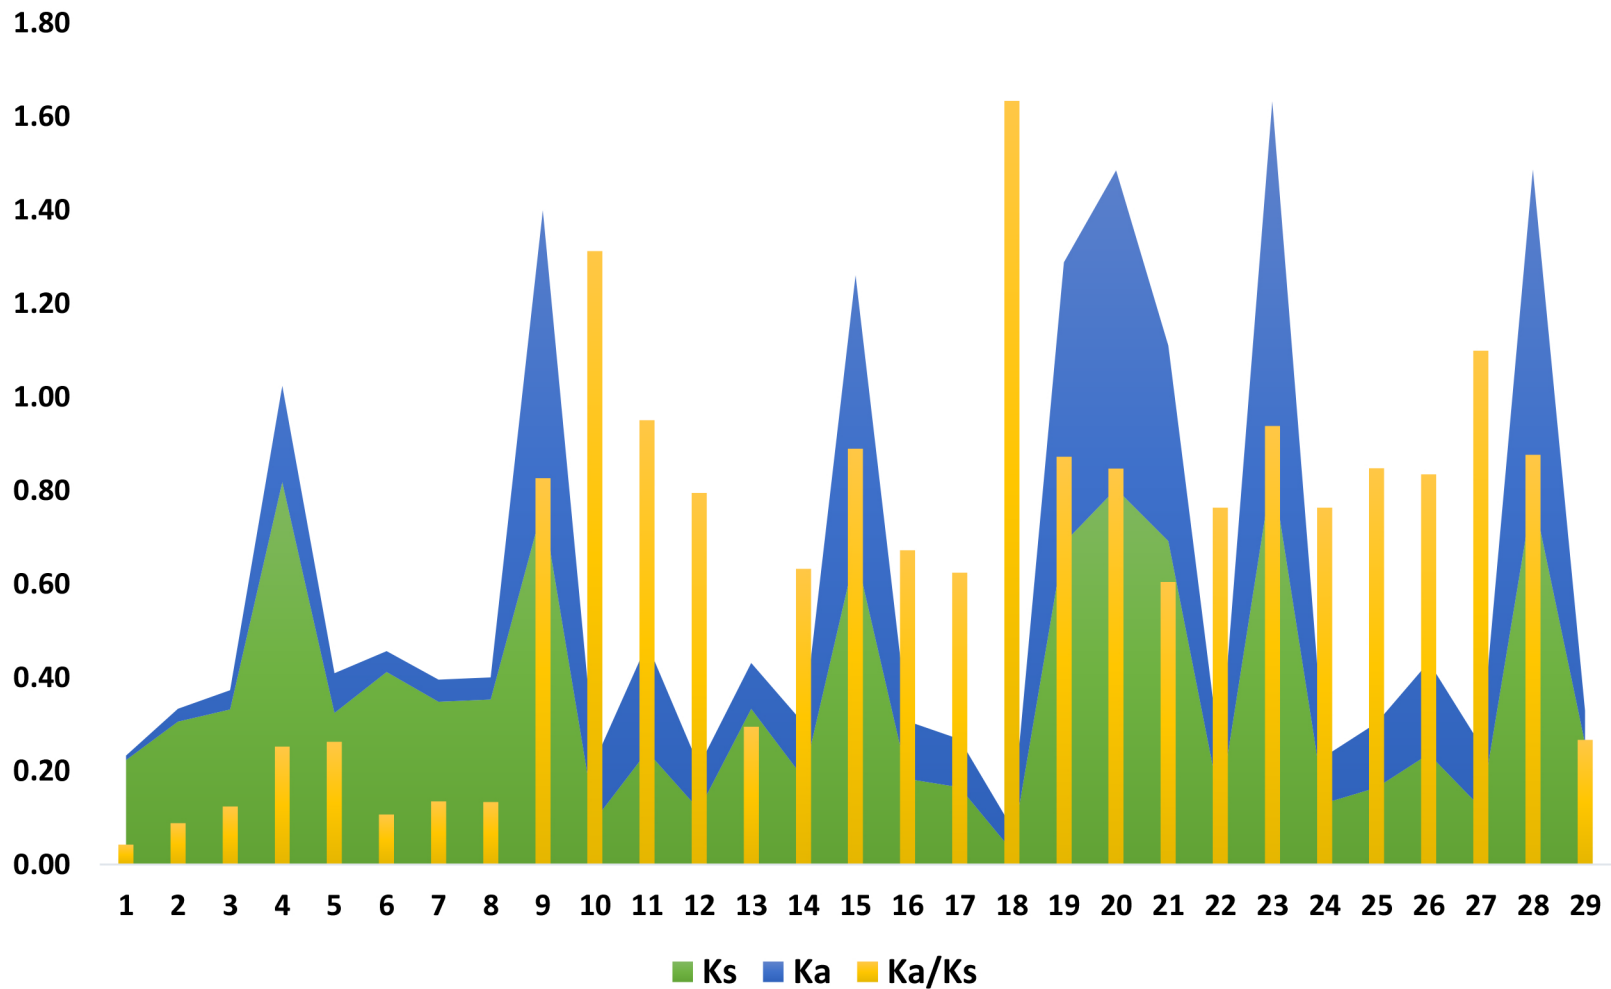

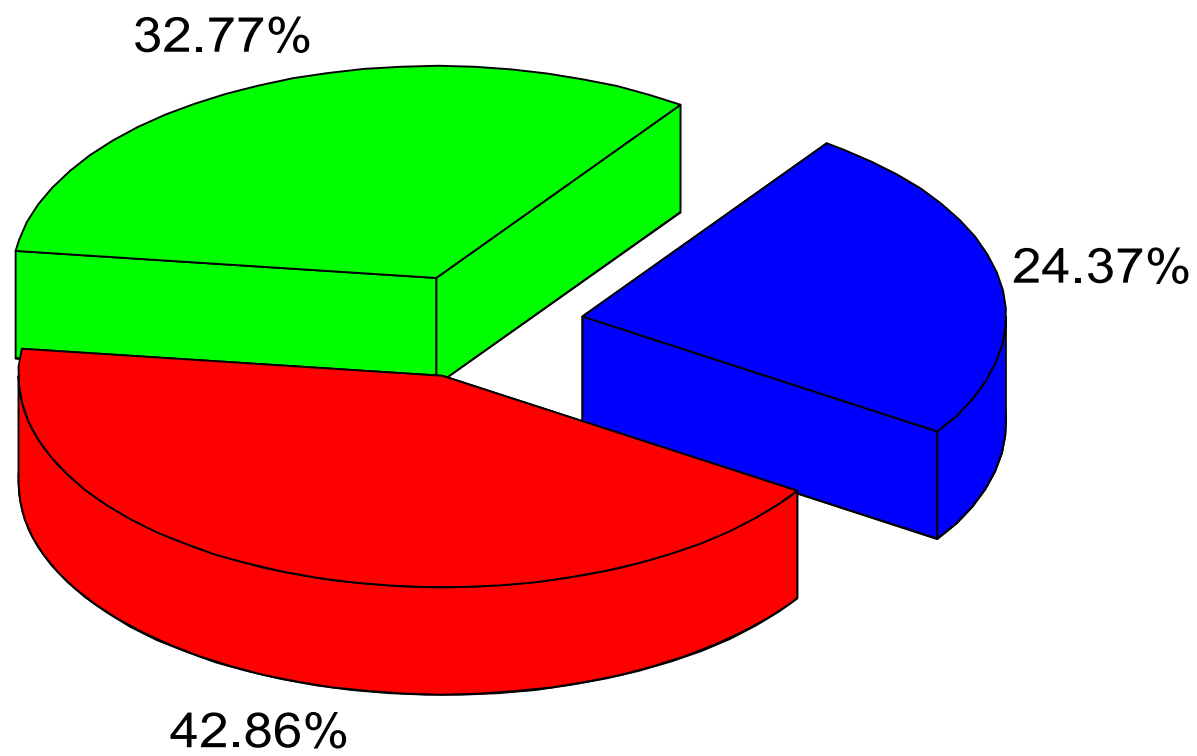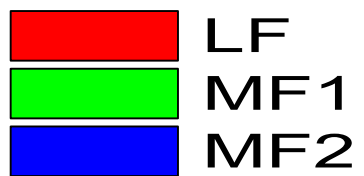

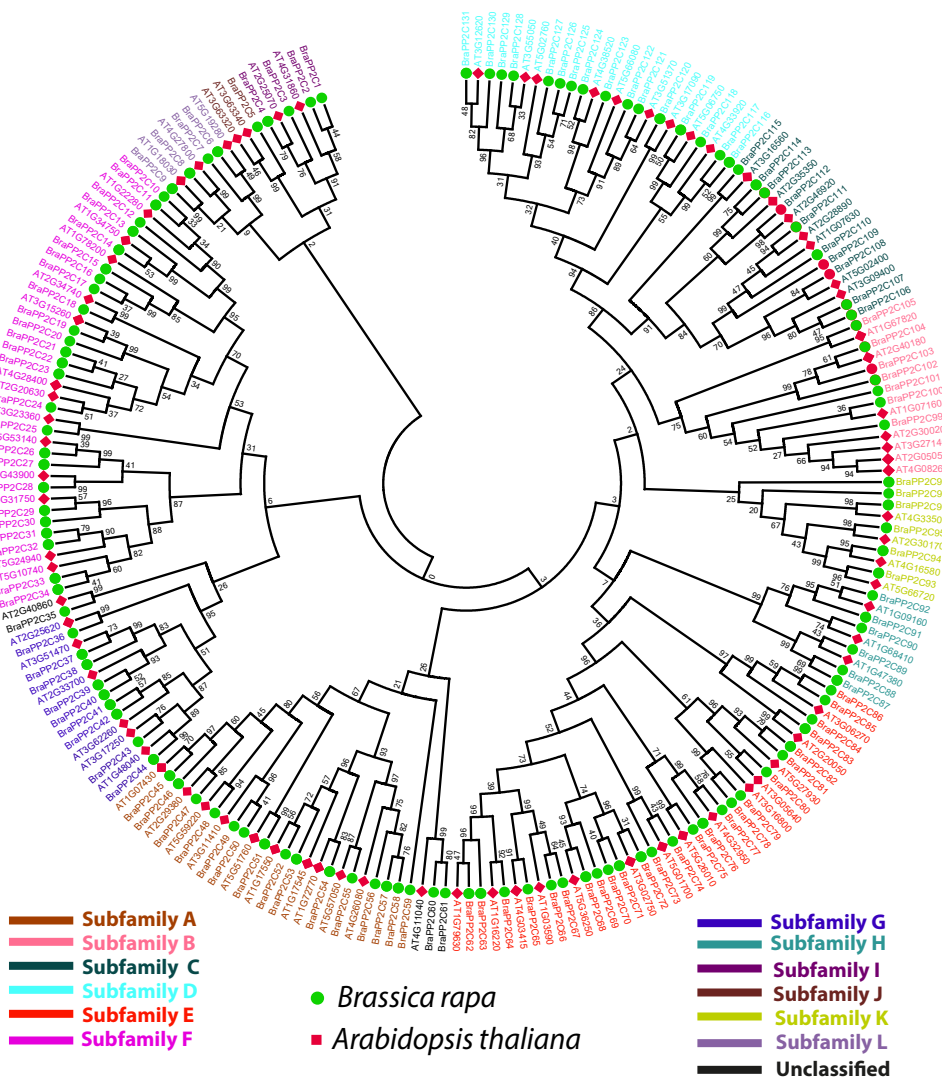

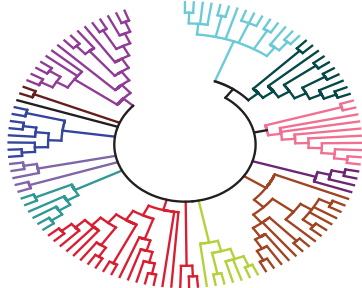

*Carica papaya*

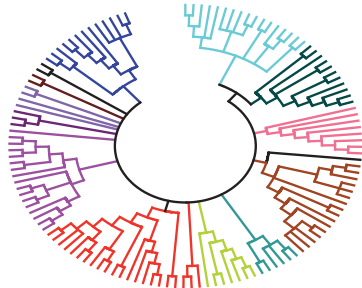

*Fragaria vesca*

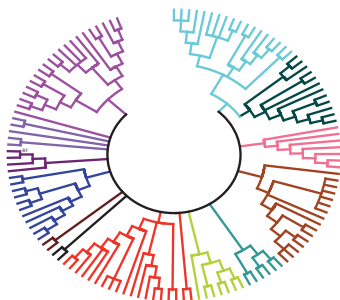

*Vitis vinifera*

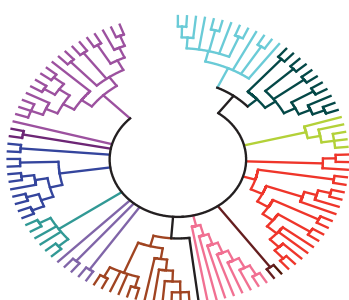

*Amborella trichopoda*

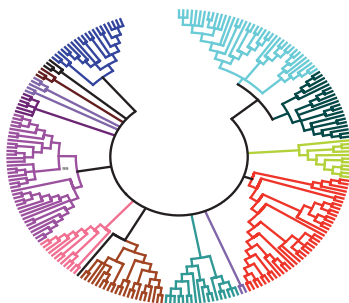

*Populus trichocarpa*

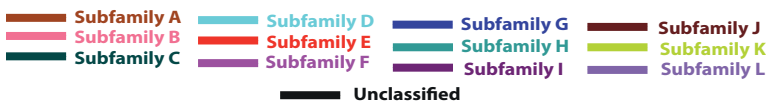

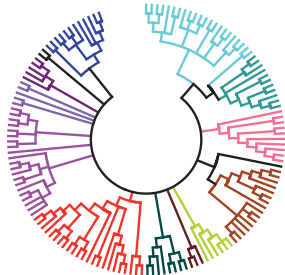

*Solanum lycopersicum*

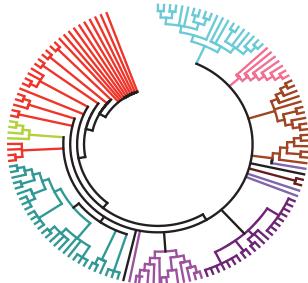

*Physcomitrella patens*

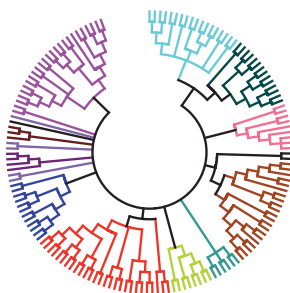

*Arabidopsis lyrata*

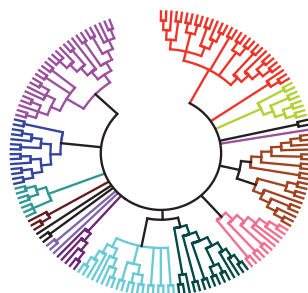

*Capsella rubella*

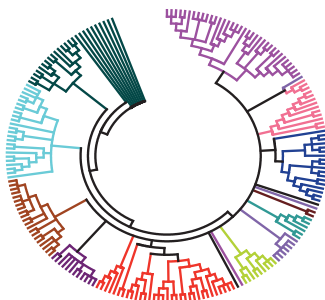

*Citrus sinensis*

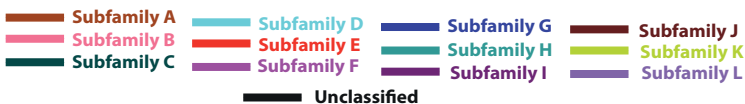

A

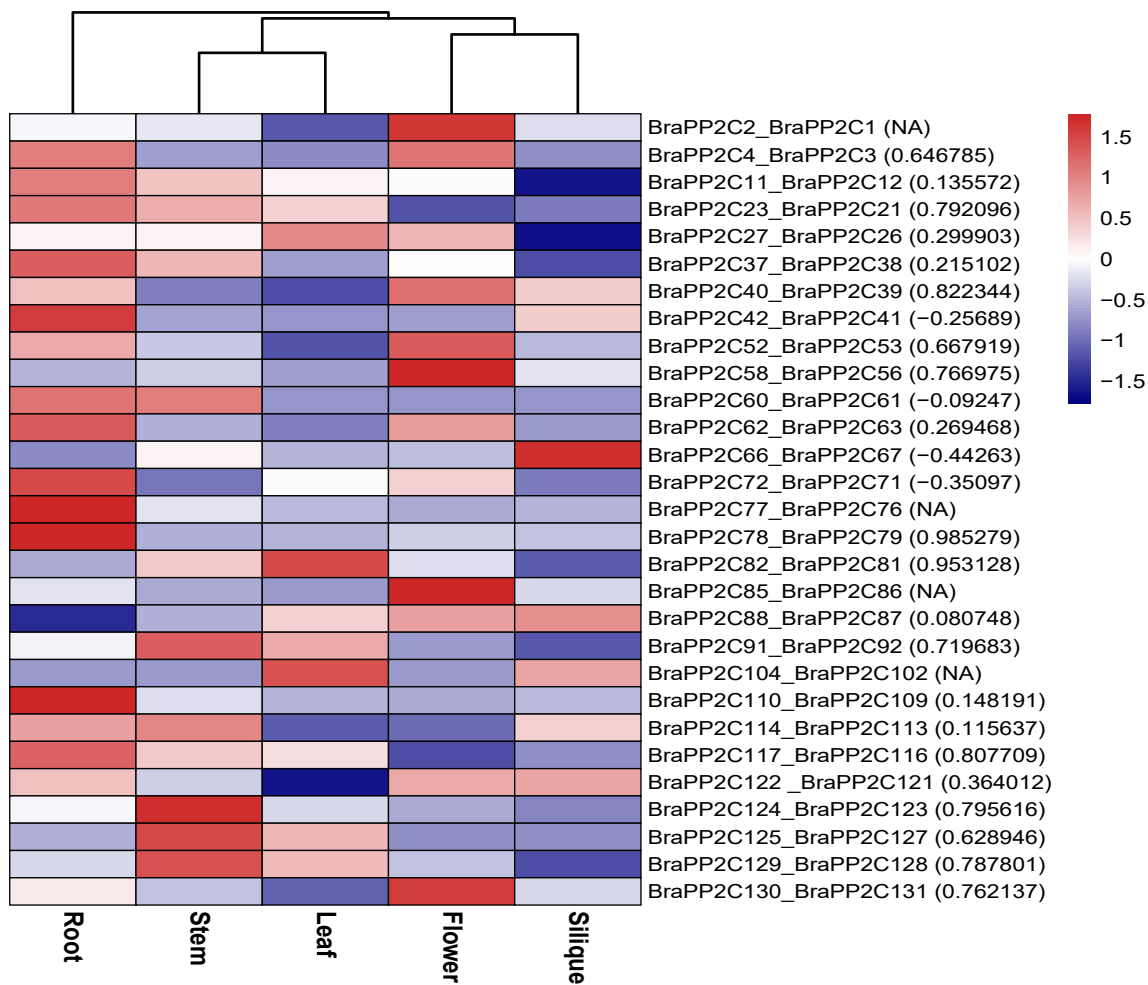

B

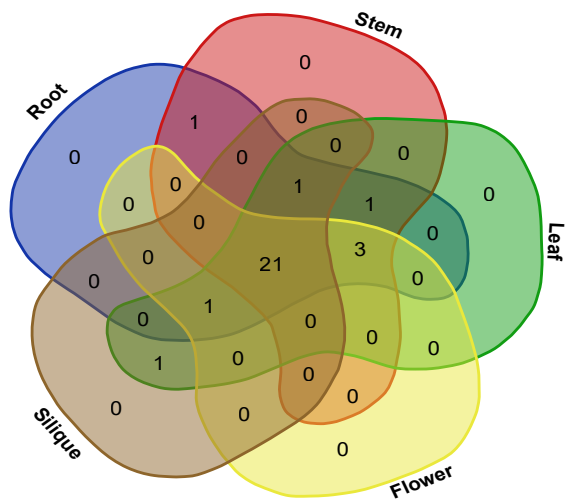



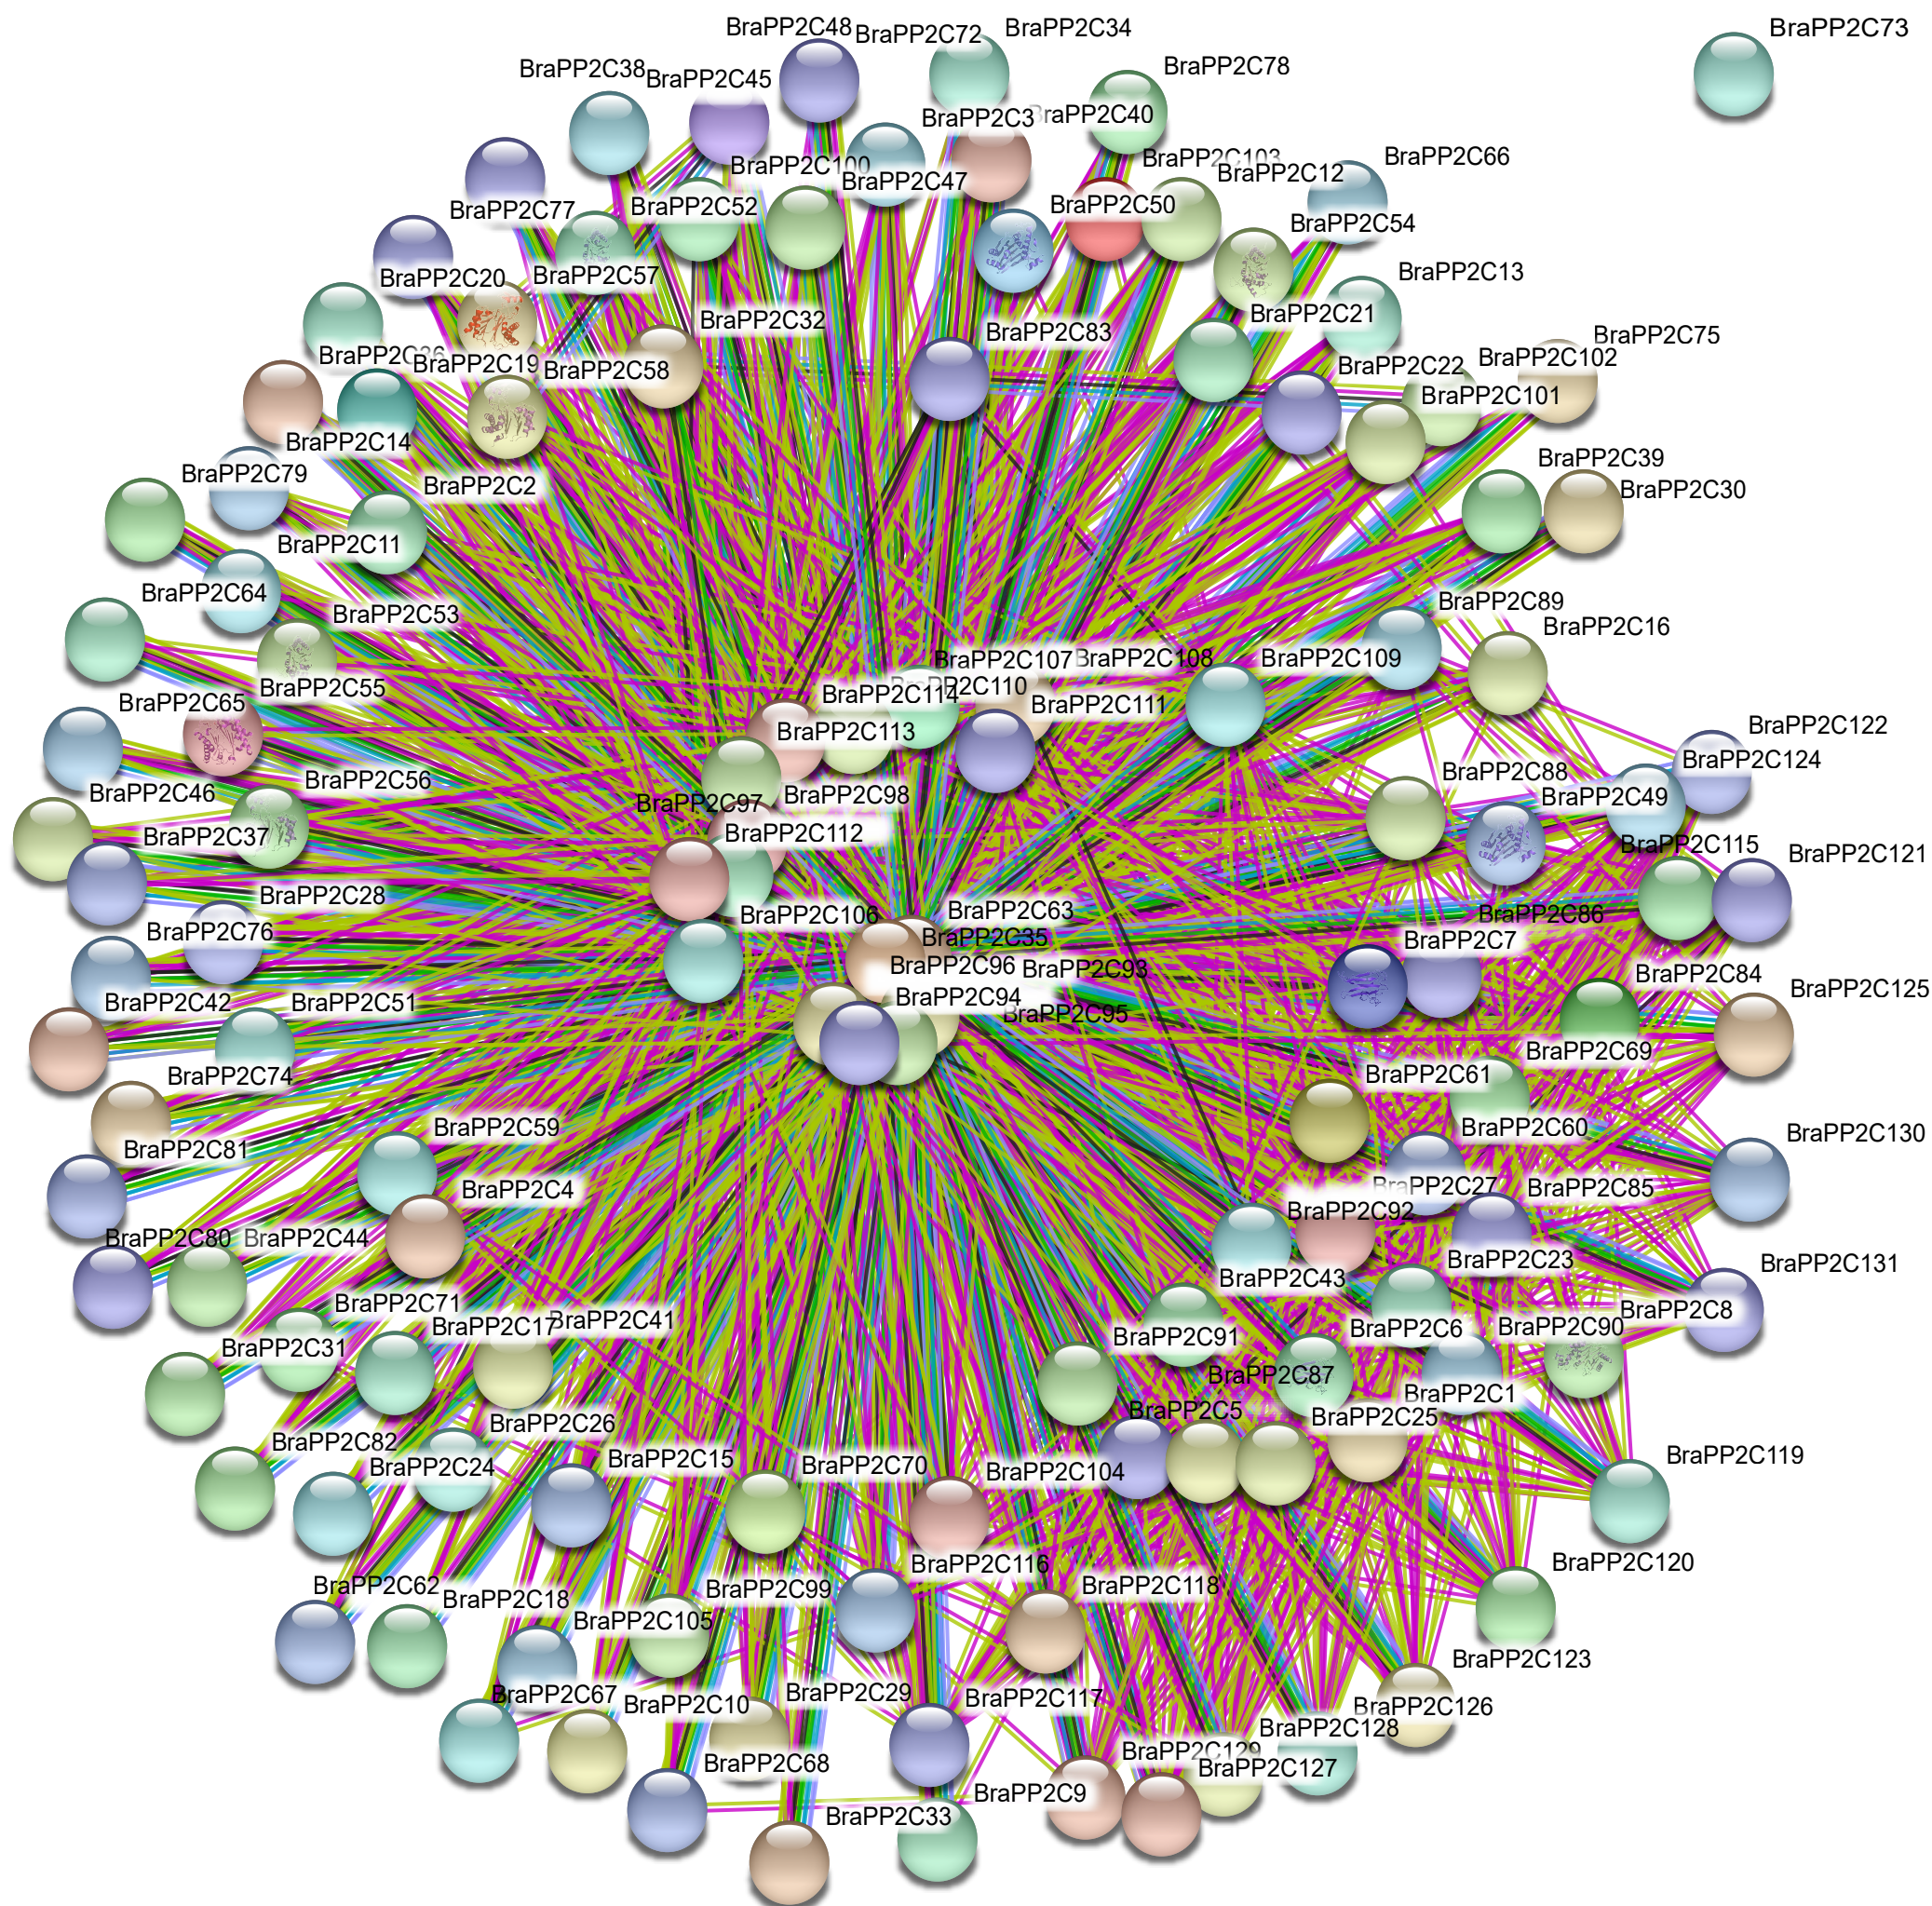

Supplement: f1 [file 2965035.f1.zip]
