# Supplementary material for: Genome-Wide Identification, Evolution, and Transcriptional Profiling of PP2C Gene Family in Brassica rapa
Source: Biomed Res Int. 2019 Apr 3;2019:2965035. doi: 10.1155/2019/2965035 (PMC6470454; doi:10.1155/2019/2965035)
Supplement: Supplementary Materials — Figure S1: indication of isoelectric point (pI) values for PP2C based on B. rapa chromosomes (Br01-Br10). Figure S2: grand average of hydropathicity (GRAVY) of PP2C genes. Figure S3: the number of exon for the PP2C gene based on B. rapa chromosomes (Br01-Br10). Figure S4: gene structure, the exon-intron, and upstream/downstream region are represented by black boxes and blue boxes, respectively. At the bottom of the figure, the relative position is proportionally displayed based on the kilobase scale. Figure S5: the conserved motifs of PP2C were elucidated by MEME. Different motifs and their positions are represented by different colors, numbered 1–10 at the bottom. Figure S6: the LOGOS of PP2C were also elucidated by MEME online server. Figure S7: the ratios of three subgenomes of B. rapa for PP2C genes. Figure S8: the correlation between Ks and Ka for paralogous gene pairs. Figure S9: phylogenetic relationship of PP2C between B. rapa and A. thaliana. The phylogenetic tree was constructed by MEGA 7 using the Maximum Likelihood Method (1000 bootstrap). Genes of various subgroups of PP2C are marked with different color. Figure S10: phylogenetic relationship of PP2C among other species and A. thaliana. The phylogenetic tree was constructed by MEGA 7 using the Maximum Likelihood Method (1000 bootstrap). Genes of PP2C for different subgroups are marked with different colors. Figure S11: phylogenetic relationship of PP2C among other species and A. thaliana. The phylogenetic tree was constructed by MEGA 7 using the Maximum Likelihood Method (1000 bootstrap). Genes of PP2C for different subgroups are marked with different colors. Figure S12A: heatmap of expression profiles for 29 paralogous pairs in five various tissues: root, stem, leaf, flower, and silique. The Pearson correlation coefficients (PCCs) are also displayed in brackets, while NA indicates no available results for PCC. B. Venn diagram analysis of the tissue expression of paralogous pairs for PP2C. Figure S13: t [file 2965035.f1.zip]

Archive with 11 entries (11 files):
- Merged Supplementary Figures (1).pdf
- Table S1 (2).xlsx
- Table S10 (1).xlsx
- Table S2 (1).xlsx
- Table S3 (1).xlsx
- Table S4 (1).xlsx
- Table S5 (1).xlsx
- Table S6 (2).xlsx
- Table S7 (1).xlsx
- Table S8 (1).xlsx
- Table S9 (1).xlsx
