# Supplementary material for: Genome-Wide Identification, Evolution, and Transcriptional Profiling of PP2C Gene Family in Brassica rapa
Source: Biomed Res Int. 2019 Apr 3;2019:2965035. doi: 10.1155/2019/2965035 (PMC6470454; doi:10.1155/2019/2965035)
Supplement: Supplementary Materials — Figure S1: indication of isoelectric point (pI) values for PP2C based on B. rapa chromosomes (Br01-Br10). Figure S2: grand average of hydropathicity (GRAVY) of PP2C genes. Figure S3: the number of exon for the PP2C gene based on B. rapa chromosomes (Br01-Br10). Figure S4: gene structure, the exon-intron, and upstream/downstream region are represented by black boxes and blue boxes, respectively. At the bottom of the figure, the relative position is proportionally displayed based on the kilobase scale. Figure S5: the conserved motifs of PP2C were elucidated by MEME. Different motifs and their positions are represented by different colors, numbered 1–10 at the bottom. Figure S6: the LOGOS of PP2C were also elucidated by MEME online server. Figure S7: the ratios of three subgenomes of B. rapa for PP2C genes. Figure S8: the correlation between Ks and Ka for paralogous gene pairs. Figure S9: phylogenetic relationship of PP2C between B. rapa and A. thaliana. The phylogenetic tree was constructed by MEGA 7 using the Maximum Likelihood Method (1000 bootstrap). Genes of various subgroups of PP2C are marked with different color. Figure S10: phylogenetic relationship of PP2C among other species and A. thaliana. The phylogenetic tree was constructed by MEGA 7 using the Maximum Likelihood Method (1000 bootstrap). Genes of PP2C for different subgroups are marked with different colors. Figure S11: phylogenetic relationship of PP2C among other species and A. thaliana. The phylogenetic tree was constructed by MEGA 7 using the Maximum Likelihood Method (1000 bootstrap). Genes of PP2C for different subgroups are marked with different colors. Figure S12A: heatmap of expression profiles for 29 paralogous pairs in five various tissues: root, stem, leaf, flower, and silique. The Pearson correlation coefficients (PCCs) are also displayed in brackets, while NA indicates no available results for PCC. B. Venn diagram analysis of the tissue expression of paralogous pairs for PP2C. Figure S13: t [file 2965035.f1.zip › Table S1 (2).xlsx]

## Sheet: Table S1
Table. 1	Sequences of the BraPP2C gene primers used for quantitative real-time PCR
Genes	Sense Primer (5'->3')	Anti-Sense Primer (5'->3')
BraPP2C2	TTACTGGACCTAACTCTG	TTCTGGATATGACACAAC
BraPP2C1	GCTTGTTGTTTCAAATGA	CAGTATCCTTTCTTTCTCA
BraPP2C56	CACAACACAACACAACAC	AAGTCAACGGTCTCCTAA
BraPP2C58	TTCTGCTTATCATCTTCT	TCATCATCATCATCATCA
BraPP2C66	TAGCGAGGAGGATAAGTT	AGAAGCATTCAACATTAGGA
BraPP2C67	GATGATTGTGCTGTTGTG	TGATTCTACTGAGGAGGAT
BraPP2C72	CGCTCTTGTTGCTGTTCA	GCCACCATCATAATAAGGAATAGT
BraPP2C71	CGGTCTGCTTGTATCTAA	ATCCATCATCAATCTCATCT
BraPP2C77	GAAGCCATACTCGTAGAATA	AAGCGGATAGGATAAGGA
BraPP2C76	GGTGAGCAAGATAGTAAGAA	GGAGGAAGAGCAATCAAG
BraPP2C78	CTCTCCATCTGAATATAACTA	GTAATAGCAACAACTTCTG
BraPP2C79	GCGACAATGATAATGATG	GCCAAGAAGACATAACAT
BraPP2C82	GAATGTGAATGAATGGTTA	GTTCGGAGACTATTGTAT
BraPP2C81	CCAACCTATAACCGATAAC	ATGCTACAACTTACAACTC
BraPP2C85	GGAGTTGTGTCTTTATGTC	CCTGAAGTGTCTATGGTT
BraPP2C86	TATCATCAGTCCTATTCT	TCTTATGTCTATGTTGTG
BraPP2C88	ATAAGGAACTGGAACAAT	TGGAGACTTCTAATAACTAA
BraPP2C87	TTGTCATAGTAGAAGGAT	ATCAGCAGATAAGTAATAG
BraPP2C91	CAGTGTCTAATGATATAAGC	GAGGTCTATTGGTGATAC
BraPP2C92	TGTATGCCAAGTAGACCAAT	TTAGATGCTGAGGAGATGATAG
BraPP2C104	TCAGCAGTCAACATAACC	GTAATACTATCATTCTACCATTCC
BraPP2C102	GATGATAGATGAACACTT	CTCTTCTTCCAATACAAT
BraPP2C110	GAATGCTCTTGTGACCTT	TCTGATTGTGTTATGTTCTTATG
BraPP2C109	CCGTTCTCCTTGTGGTAT	GCTGGTATAATGATGAAGATTCT
BraPP2C114	GTCTCTTCGTCACTACAG	GTTGCTCAGGTATTGGTA
BraPP2C113	CTTCTAACTCTACTTCTTCCT	TCTGATGGCTAACCTCTA
BraPP2C117	TCTGAGCGTAGTGAGTAG	ATAAGCGTCGTTGTTGTT
BraPP2C116	CTGACCGTAATGAGTAGA	CATAAGCGTTGTTGTAGT
BraPP2C125	GATAGACAACAATAACAG	TATCTTCATAATCTCCAG
BraPP2C127	AGTAGCCACCTCTTATTG	AACCGTTATTGTAGTATATCTC
Actin	CTCAGTCCAAAAGAGGTATTCT	GTAGAATGTGTGATGCCAGATC
