# Supplementary material for: Genome-Wide Identification, Evolution, and Transcriptional Profiling of PP2C Gene Family in Brassica rapa
Source: Biomed Res Int. 2019 Apr 3;2019:2965035. doi: 10.1155/2019/2965035 (PMC6470454; doi:10.1155/2019/2965035)
Supplement: Supplementary Materials — Figure S1: indication of isoelectric point (pI) values for PP2C based on B. rapa chromosomes (Br01-Br10). Figure S2: grand average of hydropathicity (GRAVY) of PP2C genes. Figure S3: the number of exon for the PP2C gene based on B. rapa chromosomes (Br01-Br10). Figure S4: gene structure, the exon-intron, and upstream/downstream region are represented by black boxes and blue boxes, respectively. At the bottom of the figure, the relative position is proportionally displayed based on the kilobase scale. Figure S5: the conserved motifs of PP2C were elucidated by MEME. Different motifs and their positions are represented by different colors, numbered 1–10 at the bottom. Figure S6: the LOGOS of PP2C were also elucidated by MEME online server. Figure S7: the ratios of three subgenomes of B. rapa for PP2C genes. Figure S8: the correlation between Ks and Ka for paralogous gene pairs. Figure S9: phylogenetic relationship of PP2C between B. rapa and A. thaliana. The phylogenetic tree was constructed by MEGA 7 using the Maximum Likelihood Method (1000 bootstrap). Genes of various subgroups of PP2C are marked with different color. Figure S10: phylogenetic relationship of PP2C among other species and A. thaliana. The phylogenetic tree was constructed by MEGA 7 using the Maximum Likelihood Method (1000 bootstrap). Genes of PP2C for different subgroups are marked with different colors. Figure S11: phylogenetic relationship of PP2C among other species and A. thaliana. The phylogenetic tree was constructed by MEGA 7 using the Maximum Likelihood Method (1000 bootstrap). Genes of PP2C for different subgroups are marked with different colors. Figure S12A: heatmap of expression profiles for 29 paralogous pairs in five various tissues: root, stem, leaf, flower, and silique. The Pearson correlation coefficients (PCCs) are also displayed in brackets, while NA indicates no available results for PCC. B. Venn diagram analysis of the tissue expression of paralogous pairs for PP2C. Figure S13: t [file 2965035.f1.zip › Table S2 (1).xlsx]

## Sheet: Table S2
		Table. 2	The basic information of PP2C genes identified in Brassica rapa
Gene Name	Protien Identifier	Chromosome Location	cDNA Length (bp)		Protein Properties				Subcellular Prediction
				Protein Length (aa)	Exon Number	Mw (kDa)	pI	GRAVY
BraPP2C1	Bra010216	A08:12458401-12459033	632	102	11	11.7703	-0.653	6.41	mito: 7, cyto: 3, chlo: 1, nucl: 1, plas: 1, pero: 1
BraPP2C2	Bra023979	A03:28507762-28509563	1801	375	11	41.3354	-0.37	5.01	nucl: 11, chlo: 1, cyto: 1, vacu: 1
BraPP2C3	Bra032043	A04:11645959-11647520	1561	364	8	40.1678	-0.565	4.69	nucl: 5, mito: 5, chlo: 2, cyto: 2
BraPP2C4	Bra007820	A09:32577868-32580312	2444	372	10	41.2554	-0.571	4.93	nucl: 11, cyto: 3
BraPP2C5	Bra040446	A04:26180-31987	5807	1059	21	117.953	-0.378	6.11	chlo: 8, vacu: 3, nucl: 2, cyto: 1
BraPP2C6	Bra023718	A02:3688521-3691871	3350	561	13	62.151	-0.226	5.56	chlo: 10, nucl: 3.5, cysk_nucl: 2.5
BraPP2C7	Bra002223	A10:10854912-10857840	2928	571	13	63.0328	-0.248	5.64	chlo: 12, cyto: 1, mito: 1
BraPP2C8	Bra019026	A03:26702782-26704833	2051	391	11	43.1081	-0.152	6.43	chlo: 10, mito: 1, extr: 1, vacu: 1, golg: 1
BraPP2C9	Bra025933	A06:6617066-6619209	2143	382	10	41.7967	-0.284	7.08	cyto: 8, nucl: 3, chlo: 2, mito: 1
BraPP2C10	Bra012319	A07:10790191-10791516	1325	281	6	30.92	-0.432	6.72	cysk: 10, nucl: 3, chlo: 1
BraPP2C11	Bra031382	A09:25992382-25993743	1361	281	6	30.7617	-0.431	7.75	nucl: 11, chlo: 1, cyto: 1, plas: 1
BraPP2C12	Bra016383	A08:17394786-17395978	1192	279	5	30.4693	-0.397	6.67	cyto: 9, chlo: 3, nucl: 1, cysk: 1
BraPP2C13	Bra028065	A09:18800720-18801801	1081	282	5	31.064	-0.429	6.39	cysk: 12, nucl: 2
BraPP2C14	Bra034432	A05:14024918-14026249	1331	281	6	30.7738	-0.363	6.76	cyto: 9, cysk: 2, chlo: 1, plas: 1, E.R._vacu: 1
BraPP2C15	Bra035018	A07:25088884-25090060	1176	282	4	30.8754	-0.331	9.26	chlo: 7, cyto: 4, mito: 2, plas: 1
BraPP2C16	Bra015496	A10:920997-922305	1308	175	2	18.9206	-0.21	8.69	cyto: 10, nucl: 3, extr: 1
BraPP2C17	Bra026703	A09:35044718-35046144	1426	193	4	20.987	-0.245	8.97	nucl: 7, cyto: 6, mito: 1
BraPP2C18	Bra022988	A03:8118280-8119775	1495	311	7	34.8422	-0.631	5.41	cyto: 8, chlo: 2, nucl: 2, mito: 1, plas: 1
BraPP2C19	Bra001589	A03:17247450-17249160	1710	286	6	31.3408	-0.293	5.89	cyto: 10, mito: 3, plas: 1
BraPP2C20	Bra027266	A05:20735218-20736609	1391	288	6	31.4397	-0.277	5.5	cyto: 8, mito: 3, nucl: 2, plas: 1
BraPP2C21	Bra024205	A03:26923620-26925164	1544	287	5	31.3979	-0.24	7.24	cyto: 12, chlo: 1, mito: 1
BraPP2C22	Bra040157	A01:4379794-4381202	1408	288	5	31.656	-0.356	7.87	cyto: 11, mito: 2, nucl: 1
BraPP2C23	Bra026259	A01:10129705-10132450	2745	204	5	22.5077	-0.094	6.06	chlo: 6, nucl: 2, vacu: 2, cyto: 1, mito: 1, plas: 1, E.R.: 1
BraPP2C24	Bra031134	A09:34088937-34090374	1437	280	5	30.9871	-0.368	6.13	cyto: 10, chlo: 2, nucl: 2
BraPP2C25	Bra014942	A07:7266003-7268069	2066	277	5	31.3155	-0.408	6.2	chlo: 9, cyto: 2, mito: 2, nucl: 1
BraPP2C26	Bra029095	A03:6336470-6339230	2760	406	9	44.6268	-0.56	4.89	chlo: 11, mito: 2, cyto: 1
BraPP2C27	Bra003080	A10:5418969-5420430	1461	109	9	11.76	-0.411	4.57	chlo: 10, nucl: 3, mito: 1
BraPP2C28	Bra036935	Scaffold000123:90550-91918	1368	276	7	30.0737	-0.211	4.99	cyto: 9, chlo: 2, mito: 1, extr: 1, golg: 1
BraPP2C29	Bra011296	A01:2882042-2883961	1919	307	9	32.8422	-0.305	4.75	cyto: 9, chlo: 4, mito: 1
BraPP2C30	Bra010222	A08:12495630-12497692	2062	311	9	33.3098	-0.298	4.75	cyto: 6, nucl: 3, chlo: 2, plas: 2, cysk: 1
BraPP2C31	Bra020479	A02:24557754-24559692	1938	418	10	44.8739	-0.557	5	mito: 6, cyto: 5, chlo: 2, nucl: 1
BraPP2C32	Bra009806	A06:18018128-18024909	6781	1081	14	119.627	-0.279	6.06	chlo: 7, mito: 6, cyto: 1
BraPP2C33	Bra009008	A10:13654156-13655920	1764	316	9	34.1068	-0.366	4.89	cysk: 8, mito: 4, cyto: 1, extr: 1
BraPP2C34	Bra028570	A02:1663520-1665528	2008	333	8	35.9328	-0.364	4.85	pero: 10, cyto: 4
BraPP2C35	Bra000209	A03:9902282-9905255	2973	655	11	72.3512	-0.213	5.62	cyto: 5, nucl: 4, chlo: 2, vacu: 1.5, E.R._vacu: 1.5, plas: 1
BraPP2C36	Bra007784	A09:32378021-32379419	1398	392	3	42.7411	-0.353	5.19	nucl: 11, chlo: 1, cyto: 1, plas: 1
BraPP2C37	Bra036796	A09:27287437-27288833	1396	315	3	34.5773	-0.392	5.7	nucl: 9.5, cyto_nucl: 6.5, cyto: 2.5, chlo: 1, mito: 1
BraPP2C38	Bra038901	A01:15652906-15654129	1223	357	3	39.0633	-0.364	5.62	nucl: 8.5, cyto_nucl: 6, cyto: 2.5, cysk: 2, chlo: 1
BraPP2C39	Bra021870	A04:15056353-15058420	2067	401	5	44.3577	-0.166	5.15	cyto: 3, E.R.: 3, nucl: 2, plas: 2, chlo: 1, mito: 1, extr: 1, vacu: 1
BraPP2C40	Bra005481	A05:5735307-5736696	1389	376	5	41.2397	-0.215	5.09	cyto: 7, chlo: 3, cysk: 2, nucl: 1, golg: 1
BraPP2C41	Bra014405	A04:358169-361636	3467	467	4	51.3345	0.001	5.11	chlo: 4, nucl: 3.5, plas: 3, cysk_nucl: 2.5, cyto: 1, vacu: 1, E.R.: 1
BraPP2C42	Bra007669	A09:31851952-31853751	1799	374	4	40.4878	-0.064	4.74	cyto: 8.5, cyto_nucl: 6, nucl: 2.5, chlo: 1, extr: 1, E.R._vacu: 1
BraPP2C43	Bra022205	A05:19812647-19814081	1434	264	2	29.629	-0.094	6.21	chlo: 10.5, chlo_mito: 7, mito: 2.5, plas: 1
BraPP2C44	Bra018701	A06:2536152-2537824	1672	375	2	41.3744	-0.2	4.85	nucl: 10, cyto: 2, chlo: 1, cysk: 1
BraPP2C45	Bra031574	A09:37520198-37521933	1735	436	3	48.9319	-0.727	6.17	nucl: 7.5, cyto_nucl: 5.5, cyto: 2.5, cysk: 2, chlo: 1, plas: 1
BraPP2C46	Bra015579	A10:425371-426819	1448	426	3	47.7816	-0.702	5.87	cyto: 7, nucl: 5, chlo: 1, plas: 1
BraPP2C47	Bra018398	A05:7971849-7973522	1673	366	4	40.943	-0.51	5.49	cyto: 7, nucl: 4, plas: 2, cysk: 1
BraPP2C48	Bra002594	A10:8758197-8760040	1843	412	4	45.6637	-0.337	6	cyto: 5, nucl: 4, chlo: 2, plas: 2, cysk: 1
BraPP2C49	Bra034845	A05:22423196-22424483	1287	399	2	43.1133	-0.425	6.23	nucl: 8, cyto: 4, plas: 1, E.R._vacu: 1
BraPP2C50	Bra002038	A07:2356240-2357474	1234	380	2	41.1554	-0.347	5.52	nucl: 6.5, cyto_nucl: 6.5, cyto: 5.5, plas: 1, extr: 1
BraPP2C51	Bra029160	A03:6631767-6633899	2132	418	4	45.5394	-0.447	5.69	nucl: 5, cyto: 5, chlo: 2, plas: 1, cysk: 1
BraPP2C52	Bra025964	A06:6430496-6432520	2024	508	4	55.5447	-0.18	4.72	chlo: 4, nucl: 2, cyto: 2, plas: 2, mito: 1, extr: 1, vacu: 1, E.R.: 1
BraPP2C53	Bra016595	A08:18435100-18436404	1304	410	2	45.4616	-0.183	4.86	chlo: 4, nucl: 2, plas: 2, E.R.: 2, cyto: 1, mito: 1, extr: 1, vacu: 1
BraPP2C54	Bra016034	A07:23028836-23030569	1733	484	4	52.6157	-0.149	4.86	chlo: 4, nucl: 2, plas: 2, vacu: 2, cyto: 1, mito: 1, extr: 1, E.R.: 1
BraPP2C55	Bra002766	A10:7792501-7794112	1611	422	5	46.3266	-0.309	6.07	chlo: 11, cyto: 2, mito: 1
BraPP2C56	Bra019121	A03:26255986-26257504	1518	413	4	45.2701	-0.401	5.51	nucl: 9, chlo: 2, cyto: 1, plas: 1, golg: 1
BraPP2C57	Bra010441	A08:13781563-13783074	1511	422	4	46.7137	-0.504	5.89	nucl: 10, chlo: 2, cyto: 1, cysk: 1
BraPP2C58	Bra013945	A01:8647623-8649208	1585	425	4	46.6148	-0.413	6.44	nucl: 10, chlo: 2, cyto: 1, golg: 1
BraPP2C59	Bra030455	A05:11563889-11565185	1296	159	3	17.6846	-0.777	4.51	nucl: 6.5, cyto: 6, cysk_nucl: 4, chlo: 1
BraPP2C60	Bra035258	A09:16551990-16554125	2135	296	5	32.1156	-0.159	7.6	chlo: 3, nucl: 3, cysk: 3, cyto: 2, extr: 2, plas: 1
BraPP2C61	Bra000731	A03:12730365-12733086	2721	297	4	31.8905	-0.038	5.5	cyto: 11, cysk: 3
BraPP2C62	Bra035131	A07:25592297-25594298	2001	487	4	53.7154	-0.396	4.73	nucl: 8, cyto: 4, chlo: 2
BraPP2C63	Bra008427	A02:14577949-14586025	8076	1465	18	160.431	-0.215	5.56	chlo: 4, nucl: 3.5, cysk_nucl: 2.5, plas: 2, E.R.: 2, mito: 1, vacu: 1
BraPP2C64	Bra026075	A06:5945202-5947042	1840	482	5	53.2033	-0.368	5.28	chlo: 8, nucl: 3, cyto: 1, mito: 1, plas: 1
BraPP2C65	Bra034206	A09:1277080-1279596	2516	465	6	51.3627	-0.451	5.61	chlo: 12, nucl: 2
BraPP2C66	Bra033411	A10:2457470-2459060	1590	423	6	46.8124	-0.503	5.14	chlo: 12, mito: 2
BraPP2C67	Bra030536	A08:20660093-20661758	1665	447	6	49.3824	-0.485	5.23	chlo: 8, nucl: 3, cyto: 2, extr: 1
BraPP2C68	Bra035360	Scaffold000104:162078-164068	1990	438	5	48.1486	-0.375	8.42	chlo: 7, mito: 5, nucl: 2
BraPP2C69	Bra021332	A05:9794164-9794727	563	146	5	16.2063	-0.162	5.17	chlo: 12, cyto: 1, mito: 1
BraPP2C70	Bra001060	A03:14582059-14583978	1919	477	6	52.0274	-0.382	5	chlo: 11, mito: 2, nucl: 1
BraPP2C71	Bra021414	A01:26494028-26495726	1698	467	7	50.8673	-0.397	5.88	chlo: 11, nucl: 2, vacu: 1
BraPP2C72	Bra040598	A05:24925716-24927408	1692	458	7	49.9422	-0.353	5.45	chlo: 13, mito: 1
BraPP2C73	Bra028908	A02:96352-100350	3998	846	1	94.1007	-0.238	8.34	hlo: 4, E.R.: 3, plas: 2, pero: 2, cyto: 1.5, cyto_nucl: 1.5, vacu: 1
BraPP2C74	Bra009643	A10:16387649-16389163	1514	361	6	39.839	-0.359	5.92	chlo: 8, cyto: 2, extr: 2, nucl: 1, cysk: 1
BraPP2C75	Bra009875	A06:18447248-18449112	1864	338	5	37.2863	-0.261	5.19	cyto: 10, chlo: 2, nucl: 2
BraPP2C76	Bra034542	A08:12130710-12132620	1910	326	5	35.4482	-0.212	6.18	cyto: 12, plas: 1, E.R._vacu: 1
BraPP2C77	Bra037033	A03:28852593-28853989	1396	326	5	35.4862	-0.191	5.94	cyto: 9, nucl: 2, plas: 1, cysk: 1, E.R._vacu: 1
BraPP2C78	Bra022179	A05:19988417-19989934	1517	351	6	38.7397	-0.206	8.37	nucl: 11, mito: 2, cyto: 1
BraPP2C79	Bra021202	A01:22554176-22555910	1734	351	6	38.9388	-0.166	6.94	nucl: 10, chlo: 2, cyto: 1, mito: 1
BraPP2C80	Bra040530	Scaffold000215:35214-37203	1989	348	6	38.7267	-0.345	5.67	cyto: 7, nucl: 3, plas: 2, chlo: 1, mito: 1
BraPP2C81	Bra036606	A09:2603684-2605540	1856	373	6	41.4771	-0.349	8.24	nucl: 6, chlo: 4, mito: 2, cyto: 1, pero: 1
BraPP2C82	Bra020569	A02:23954171-23956271	2100	375	7	41.6334	-0.341	8.21	nucl: 10, chlo: 2, cyto: 2
BraPP2C83	Bra040822	Scaffold000271:3906-7928	4022	996	13	107.452	-0.313	5.24	cyto: 7, chlo: 3, nucl: 1, mito: 1, vacu: 1, cysk: 1
BraPP2C84	Bra001189	A03:15237295-15238445	1150	354	2	38.6231	-0.36	4.84	chlo: 12, nucl: 1, cyto: 1
BraPP2C85	Bra040228	A01:25783584-25784093	509	138	2	15.2971	-0.226	4.36	chlo: 8, cyto: 5, nucl: 1
BraPP2C86	Bra040230	A01:25796996-25798123	1127	326	2	35.8832	-0.359	4.74	cyto: 7, nucl: 5, chlo: 2
BraPP2C87	Bra014076	A08:3801942-3803962	2020	428	10	46.2883	-0.315	5.33	cyto: 4, chlo: 2, extr: 2, golg: 2, nucl: 1, mito: 1, vacu: 1, E.R.: 1
BraPP2C88	Bra015619	A10:44760-46866	2106	428	10	46.2362	-0.332	5.33	cyto: 4, nucl: 2, extr: 2, golg: 2, chlo: 1, mito: 1, vacu: 1, E.R.: 1
BraPP2C89	Bra032214	A05:12949616-12951531	1915	424	10	46.0425	-0.272	5.48	cyto: 5, extr: 2, golg: 2, chlo: 1, nucl: 1, mito: 1, vacu: 1, E.R.: 1
BraPP2C90	Bra033938	A02:9771589-9773590	2001	426	8	45.7502	-0.192	8.24	chlo: 8, nucl: 2.5, cyto_nucl: 2.5, cyto: 1.5, plas: 1, extr: 1
BraPP2C91	Bra018578	A06:3151364-3153187	1823	292	6	31.5699	-0.105	5.4	nucl: 6.5, cyto_nucl: 5, chlo: 4, cyto: 2.5, golg: 1
BraPP2C92	Bra030759	A08:19699476-19701281	1805	427	8	45.681	-0.216	6.57	chlo: 11, cyto: 1, mito: 1, extr: 1
BraPP2C93	Bra012095	A07:12279256-12280706	1450	409	5	43.2747	-0.132	6.31	chlo: 13, mito: 1
BraPP2C94	Bra038489	A01:10712427-10713830	1403	467	2	49.4855	-0.172	6.38	chlo: 6, cyto: 4, nucl: 2, mito: 2
BraPP2C95	Bra018331	A05:7512648-7514410	1762	302	11	32.536	-0.042	5.1	chlo: 12.5, chlo_mito: 7.5, mito: 1.5
BraPP2C96	Bra011448	A01:2128418-2131913	3495	794	9	86.1925	-0.316	4.39	chlo: 12, mito: 1.5, cyto_mito: 1.5
BraPP2C97	Bra024509	A06:16914856-16916066	1210	315	4	34.5398	-0.354	5.37	chlo: 8, nucl: 2, cyto: 2, mito: 2
BraPP2C98	Bra002689	A10:8292106-8296733	4627	188	2	20.6338	-0.671	4.96	nucl: 11, mito: 2, extr: 1
BraPP2C99	Bra018346	A05:7632628-7633774	1146	355	3	38.0037	-0.317	6.27	chlo: 13, nucl: 1
BraPP2C100	Bra022772	A03:6980635-6981844	1209	375	2	40.2404	-0.293	5.96	chlo: 13, mito: 1
BraPP2C101	Bra015558	A10:548112-549321	1209	188	3	20.8199	-0.726	5.2	nucl: 5, chlo: 4, cyto: 2, extr: 2, golg: 1
BraPP2C102	Bra017025	A04:17154426-17158621	4195	564	3	63.2621	-0.435	7.19	cyto: 9, nucl: 4, cysk: 1
BraPP2C103	Bra000174	A03:9731578-9733080	1502	365	3	39.6733	-0.27	5.97	chlo: 14
BraPP2C104	Bra004980	A05:2787981-2789644	1663	305	3	32.9007	-0.301	8.27	chlo: 14
BraPP2C105	Bra033976	A02:9506648-9508017	1369	386	4	42.9669	-0.453	7.15	chlo: 5, nucl: 5, mito: 4
BraPP2C106	Bra029766	A05:23078646-23081008	2362	644	4	71.9678	-0.605	5.98	nucl: 14
BraPP2C107	Bra001308	A03:15799778-15802360	2582	684	4	76.5528	-0.629	5.5	nucl: 11, chlo: 2, pero: 1
BraPP2C108	Bra009593	A10:16172083-16175949	3866	804	4	90.053	-0.683	5.7	nucl: 9, chlo: 2, cyto: 1, pero: 1, mito_plas: 1
BraPP2C109	Bra030695	A08:20002876-20004904	2028	579	4	65.324	-0.562	5.6	nucl: 10, cyto: 2, chlo: 1, mito: 1
BraPP2C110	Bra015596	A10:284375-285426	1051	268	4	30.748	-0.246	4.99	E.R.: 3.5, cyto: 3, E.R._plas: 3, golg: 2, plas: 1.5, chlo: 1, nucl: 1, mito: 1, vacu: 1
BraPP2C111	Bra041012	Scaffold000375:7049-9366	2317	678	4	75.5895	-0.592	5.27	nucl: 8, cyto: 3, chlo: 1, mito: 1, vacu: 1
BraPP2C112	Bra004495	A05:444505-447302	2797	850	5	94.9167	-0.622	5.35	nucl: 9, chlo: 2, cysk: 2, plas: 1
BraPP2C113	Bra017322	A04:15483972-15486445	2473	738	4	81.0246	-0.493	5.32	chlo: 7, nucl: 5, plas: 1, pero: 1
BraPP2C114	Bra005350	A05:4971159-4973632	2473	745	4	81.8606	-0.487	5.51	chlo: 6, nucl: 4, mito: 2, cyto: 1, pero: 1
BraPP2C115	Bra022166	A05:20086820-20087677	857	233	4	25.7748	-0.039	5.91	cyto: 11.5, cyto_E.R.: 6.83333, E.R._vacu: 1.33333, chlo: 1
BraPP2C116	Bra034592	A08:11849145-11850708	1563	385	4	42.7007	-0.336	8.97	chlo: 10, mito: 3, nucl: 1
BraPP2C117	Bra036972	A03:29225659-29227357	1698	374	4	41.9472	-0.305	9.37	chlo: 8, mito: 4, nucl: 1, cyto: 1
BraPP2C118	Bra009224	A10:14758331-14761527	3196	345	5	38.6153	-0.194	7.26	mito: 5, chlo: 2, cyto: 2, vacu: 2, plas: 1, extr: 1, golg: 1
BraPP2C119	Bra028720	A02:1002174-1004004	1830	384	2	43.1562	-0.285	6.74	mito: 7, golg: 2, chlo: 1, nucl: 1, cyto: 1, plas: 1, E.R.: 1
BraPP2C120	Bra021218	A01:22464922-22466723	1801	378	4	42.0016	-0.292	6.74	chlo: 9, nucl: 3, vacu: 2
BraPP2C121	Bra038895	A01:15621460-15622887	1427	382	5	42.2554	-0.225	8.19	chlo: 6, nucl: 2.5, cyto: 2, extr: 2, cysk_nucl: 2, mito: 1
BraPP2C122	Bra036813	A09:27165321-27167988	2667	489	5	55.9359	-0.293	7	chlo: 10, cyto: 2, mito: 2
BraPP2C123	Bra010741	A08:15432398-15434045	1647	380	5	41.9818	-0.278	8.17	chlo: 6, cyto: 3, nucl: 2, plas: 2, cysk: 1
BraPP2C124	Bra033566	A06:25141046-25142565	1519	397	6	43.7687	-0.2	7.77	chlo: 8, nucl: 2, cyto: 1, mito: 1, plas: 1, cysk: 1
BraPP2C125	Bra009569	A10:16062421-16063763	1342	363	4	40.3962	-0.346	8.67	mito: 5, chlo: 3, cyto: 2.5, cyto_nucl: 2.5, golg: 2, nucl: 1.5
BraPP2C126	Bra028865	A02:316187-317514	1327	360	4	40.1948	-0.356	7.18	mito: 5, chlo: 3, cyto: 2.5, cyto_nucl: 2.5, golg: 2, nucl: 1.5
BraPP2C127	Bra005755	A03:445173-446494	1321	357	4	39.9823	-0.374	6.43	chlo: 6, mito: 4, nucl: 1, plas: 1, E.R.: 1, golg: 1
BraPP2C128	Bra014778	A04:3043976-3045211	1235	382	3	42.4914	-0.223	6.47	chlo: 9, mito: 4, cyto: 1
BraPP2C129	Bra007131	A09:28997696-28998935	1239	387	3	43.0132	-0.169	7.2	chlo: 9, mito: 4, cyto: 1
BraPP2C130	Bra034749	A05:21990458-21992101	1643	388	5	42.9912	-0.249	9.19	chlo: 10, mito: 3, nucl: 1
BraPP2C131	Bra038738	A01:24244250-24245854	1604	387	5	43.0474	-0.216	9.16	chlo: 11, mito: 3
