# Supplementary material for: Genome-Wide Identification, Evolution, and Transcriptional Profiling of PP2C Gene Family in Brassica rapa
Source: Biomed Res Int. 2019 Apr 3;2019:2965035. doi: 10.1155/2019/2965035 (PMC6470454; doi:10.1155/2019/2965035)
Supplement: Supplementary Materials — Figure S1: indication of isoelectric point (pI) values for PP2C based on B. rapa chromosomes (Br01-Br10). Figure S2: grand average of hydropathicity (GRAVY) of PP2C genes. Figure S3: the number of exon for the PP2C gene based on B. rapa chromosomes (Br01-Br10). Figure S4: gene structure, the exon-intron, and upstream/downstream region are represented by black boxes and blue boxes, respectively. At the bottom of the figure, the relative position is proportionally displayed based on the kilobase scale. Figure S5: the conserved motifs of PP2C were elucidated by MEME. Different motifs and their positions are represented by different colors, numbered 1–10 at the bottom. Figure S6: the LOGOS of PP2C were also elucidated by MEME online server. Figure S7: the ratios of three subgenomes of B. rapa for PP2C genes. Figure S8: the correlation between Ks and Ka for paralogous gene pairs. Figure S9: phylogenetic relationship of PP2C between B. rapa and A. thaliana. The phylogenetic tree was constructed by MEGA 7 using the Maximum Likelihood Method (1000 bootstrap). Genes of various subgroups of PP2C are marked with different color. Figure S10: phylogenetic relationship of PP2C among other species and A. thaliana. The phylogenetic tree was constructed by MEGA 7 using the Maximum Likelihood Method (1000 bootstrap). Genes of PP2C for different subgroups are marked with different colors. Figure S11: phylogenetic relationship of PP2C among other species and A. thaliana. The phylogenetic tree was constructed by MEGA 7 using the Maximum Likelihood Method (1000 bootstrap). Genes of PP2C for different subgroups are marked with different colors. Figure S12A: heatmap of expression profiles for 29 paralogous pairs in five various tissues: root, stem, leaf, flower, and silique. The Pearson correlation coefficients (PCCs) are also displayed in brackets, while NA indicates no available results for PCC. B. Venn diagram analysis of the tissue expression of paralogous pairs for PP2C. Figure S13: t [file 2965035.f1.zip › Table S3 (1).xlsx]

## Sheet: Table S3
Table. 3	The gene with outlier Ka/Ks values and estimated divergence time for syntenic pairs of BraPP2C.
Gene 1	Gene 2	Ks	Ka	Ka/Ks	Selection Pressure	Duplication time (MYA)
BraPP2C2	BraPP2C1	0.223171	0.0095	0.0425683	Purifying Selection	7.43902
BraPP2C4	BraPP2C3	0.305614	0.0269224	0.0880929	Purifying Selection	10.1871
BraPP2C11	BraPP2C12	0.331729	0.041	0.123595	Purifying Selection	11.0576
BraPP2C23	BraPP2C21	0.818	0.206	0.251834	Purifying Selection	27.2667
BraPP2C27	BraPP2C26	0.324	0.085	0.262346	Purifying Selection	10.8
BraPP2C37	BraPP2C38	0.412	0.044	0.106796	Purifying Selection	13.7333
BraPP2C40	BraPP2C39	0.348	0.047	0.135057	Purifying Selection	11.6
BraPP2C42	BraPP2C41	0.353	0.047	0.133144	Purifying Selection	11.7667
BraPP2C52	BraPP2C53	0.766	0.633	0.826371	Purifying Selection	25.5333
BraPP2C58	BraPP2C56	0.096	0.126	1.3125	Positive Selection	3.2
BraPP2C60	BraPP2C61	0.242	0.23	0.950413	Purifying Selection	8.06667
BraPP2C62	BraPP2C63	0.117	0.093	0.794872	Purifying Selection	3.9
BraPP2C66	BraPP2C67	0.333	0.098	0.294294	Purifying Selection	11.1
BraPP2C72	BraPP2C71	0.185	0.117	0.632432	Purifying Selection	6.16667
BraPP2C77	BraPP2C76	0.667	0.593	0.889055	Purifying Selection	22.2333
BraPP2C78	BraPP2C79	0.183	0.123	0.672131	Purifying Selection	6.1
BraPP2C82	BraPP2C81	0.165	0.103	0.624242	Purifying Selection	5.5
BraPP2C85..	BraPP2C86..	0.03	0.049	1.63333	Positive Selection	1
BraPP2C88	BraPP2C87	0.688	0.6	0.872093	Purifying Selection	22.9333
BraPP2C91	BraPP2C92	0.804	0.681	0.847015	Purifying Selection	26.8
BraPP2C104	BraPP2C102	0.692	0.418	0.604046	Purifying Selection	23.0667
BraPP2C110	BraPP2C109	0.131	0.1	0.763359	Purifying Selection	4.36667
BraPP2C114	BraPP2C113	0.842	0.79	0.938242	Purifying Selection	28.0667
BraPP2C117	BraPP2C116	0.131	0.1	0.763359	Purifying Selection	4.36667
BraPP2C122	BraPP2C121	0.164	0.139	0.847561	Purifying Selection	5.46667
BraPP2C124	BraPP2C123	0.236	0.197	0.834746	Purifying Selection	7.86667
BraPP2C125	BraPP2C127	0.121	0.133	1.09917	Positive Selection	4.03333
BraPP2C129	BraPP2C128	0.792	0.694	0.876263	Purifying Selection	26.4
BraPP2C130	BraPP2C131	0.259	0.069	0.266409	Purifying Selection	8.63333
						12.3673
