# Supplementary material for: Genome-Wide Identification, Evolution, and Transcriptional Profiling of PP2C Gene Family in Brassica rapa
Source: Biomed Res Int. 2019 Apr 3;2019:2965035. doi: 10.1155/2019/2965035 (PMC6470454; doi:10.1155/2019/2965035)
Supplement: Supplementary Materials — Figure S1: indication of isoelectric point (pI) values for PP2C based on B. rapa chromosomes (Br01-Br10). Figure S2: grand average of hydropathicity (GRAVY) of PP2C genes. Figure S3: the number of exon for the PP2C gene based on B. rapa chromosomes (Br01-Br10). Figure S4: gene structure, the exon-intron, and upstream/downstream region are represented by black boxes and blue boxes, respectively. At the bottom of the figure, the relative position is proportionally displayed based on the kilobase scale. Figure S5: the conserved motifs of PP2C were elucidated by MEME. Different motifs and their positions are represented by different colors, numbered 1–10 at the bottom. Figure S6: the LOGOS of PP2C were also elucidated by MEME online server. Figure S7: the ratios of three subgenomes of B. rapa for PP2C genes. Figure S8: the correlation between Ks and Ka for paralogous gene pairs. Figure S9: phylogenetic relationship of PP2C between B. rapa and A. thaliana. The phylogenetic tree was constructed by MEGA 7 using the Maximum Likelihood Method (1000 bootstrap). Genes of various subgroups of PP2C are marked with different color. Figure S10: phylogenetic relationship of PP2C among other species and A. thaliana. The phylogenetic tree was constructed by MEGA 7 using the Maximum Likelihood Method (1000 bootstrap). Genes of PP2C for different subgroups are marked with different colors. Figure S11: phylogenetic relationship of PP2C among other species and A. thaliana. The phylogenetic tree was constructed by MEGA 7 using the Maximum Likelihood Method (1000 bootstrap). Genes of PP2C for different subgroups are marked with different colors. Figure S12A: heatmap of expression profiles for 29 paralogous pairs in five various tissues: root, stem, leaf, flower, and silique. The Pearson correlation coefficients (PCCs) are also displayed in brackets, while NA indicates no available results for PCC. B. Venn diagram analysis of the tissue expression of paralogous pairs for PP2C. Figure S13: t [file 2965035.f1.zip › Table S4 (1).xlsx]

## Sheet: Table S4
Table. 4	Identification of BraPP2C syntenic genes between A. thaliana along with three subgenomes of Brassica rapa
Family	A.thaliana		B.rapa
		Synteny Ortholog			tPCK Chr	Block
		LF	MF1	MF2
	AT4G31870		BraPP2C2	BraPP2C1	tPCK4	U
	AT2G25070	BraPP2C4	BraPP2C3		tPCK3	I
	AT3G63320		BraPP2C5		tPCK6	N
	AT5G19280	BraPP2C7		BraPP2C6	tPCK5	R
	AT4G27800		BraPP2C8		tPCK4	U
	AT1G18030	BraPP2C9			tPCK1	A
	AT1G22280	BraPP2C11	BraPP2C12	BraPP2C10	tPCK1	B
	AT1G34750	BraPP2C13		BraPP2C14	tPCK1	B
	AT1G78200	BraPP2C15			tPCK6	E
	AT1G07160	BraPP2C16			tPCK1	A
	-			BraPP2C17	-	-
	AT2G34740			BraPP2C18	tPCK3	J
	AT3G15260	BraPP2C20		BraPP2C19	tPCK2	F
	AT4G28400	BraPP2C21	BraPP2C23		tPCK4	U
	-		BraPP2C22	-	-	-
	AT2G20630			BraPP2C24	tPCK2	H
	AT3G23360	BraPP2C25			tPCK2	F
	AT5G53140	BraPP2C27	BraPP2C26		tPCK5	wb
	AT1G43900	BraPP2C28			tPCK1	C
	AT4G31750	BraPP2C29		BraPP2C30	tPCK4	U
	AT5G24940		BraPP2C31		tPCK7	Q
	AT5G24970	BraPP2C32	Bra020480		tPCK7	Q
	AT5G10740	BraPP2C33		BraPP2C34	tPCK5	R
	AT2G40860			BraPP2C35	tPCK3	J
	AT2G25620	BraPP2C36			tPCK3	I
	AT3G51470	BraPP2C37	BraPP2C38		tPCK6	N
	AT2G33700	BraPP2C40	BraPP2C39		tPCK3	J
	AT3G62260	BraPP2C42	BraPP2C41		tPCK6	N
	AT3G17250	BraPP2C43			tPCK2	F
	AT1G48040	BraPP2C44			tPCK1	C
	AT1G07430	BraPP2C46		BraPP2C45	tPCK1	A
	AT2G29380	BraPP2C47			tPCK3	J
	AT5G59220	BraPP2C48			tPCK5	wb
	AT3G11410	BraPP2C49			tPCK2	F
	-	BraPP2C50			-	-
	AT5G51760		BraPP2C51		tPCK5	wb
	AT1G17545	BraPP2C52	BraPP2C53		tPCK1	A
	AT1G72770	BraPP2C54			tPCK6	E
	AT5G57050	BraPP2C55			tPCK5	wb
	AT4G26080	BraPP2C58	BraPP2C56	BraPP2C57	tPCK4	U
	-			BraPP2C59	-	-
	AT4G11040	BraPP2C60	BraPP2C61		tPCK5	P
	AT1G79630	BraPP2C62	BraPP2C63		tPCK6	E
	AT1G16220	BraPP2C64			tPCK1	A
	AT4G03415	BraPP2C65			tPCK5	O
	AT1G03590	BraPP2C66	BraPP2C67		tPCK1	A
	AT5G36250	BraPP2C68			tPCK4	S
	-			BraPP2C69	-	-
	AT3G02750	BraPP2C72	BraPP2C71	BraPP2C70	tPCK2	F
	AT5G01710		Bra005670	BraPP2C73	tPCK5	R
	AT5G01700	BraPP2C74			tPCK5	R
	AT5G26010	BraPP2C75			tPCK7	Q
	AT4G32950		BraPP2C77	BraPP2C76	tPCK4	U
	AT3G16800	BraPP2C78	BraPP2C79		tPCK2	F
	AT3G05640		BraPP2C80		tPCK2	F
	AT5G27930		BraPP2C82	BraPP2C81	tPCK7	Q
	AT3G06270		BraPP2C85/BraPP2C86..	BraPP2C84	tPCK2	F
	AT1G47380	BraPP2C88	BraPP2C87	BraPP2C89	tPCK1	C
	AT1G68410		BraPP2C90		tPCK6	E
	AT1G09160	BraPP2C91	BraPP2C92		tPCK1	A
	AT5G66720	BraPP2C93			tPCK7	X
	AT4G16580	BraPP2C94			tPCK4	U
	AT2G30170	BraPP2C95			tPCK3	J
	AT4G33500	BraPP2C96			tPCK4	U
	-			BraPP2C97	-	-
	AT5G57820	BraPP2C98		Bra020410	tPCK5	wb
	AT2G30020	BraPP2C99		BraPP2C100	tPCK3	J
	-	BraPP2C101			-	-
	AT2G40180	BraPP2C104	BraPP2C102	BraPP2C103	tPCK3	J
	AT1G67820		BraPP2C105		tPCK6	E
	AT3G09400	BraPP2C106		BraPP2C107	tPCK2	F
	AT5G02400	BraPP2C108			tPCK5	R
	AT1G07630	BraPP2C110	BraPP2C109		tPCK1	A
	AT2G46920	BraPP2C112			tPCK3	J
	AT2G35350	BraPP2C114	BraPP2C113		tPCK3	J
	AT3G16560	BraPP2C115			tPCK2	F
	AT4G33920		BraPP2C117	BraPP2C116	tPCK4	U
	AT5G06750	BraPP2C118		BraPP2C119	tPCK5	R
	AT3G17090		BraPP2C120		tPCK2	F
	AT3G51370	BraPP2C122	BraPP2C121	Bra012856	tPCK6	N
	AT4G38520		BraPP2C124	BraPP2C123	tPCK4	U
	AT5G02760	BraPP2C125	BraPP2C127	BraPP2C126	tPCK5	R
	AT3G55050	BraPP2C129	BraPP2C128		tPCK6	N
	AT3G12620	BraPP2C130	BraPP2C131		tPCK2	F
