# Supplementary material for: Genome-Wide Identification, Evolution, and Transcriptional Profiling of PP2C Gene Family in Brassica rapa
Source: Biomed Res Int. 2019 Apr 3;2019:2965035. doi: 10.1155/2019/2965035 (PMC6470454; doi:10.1155/2019/2965035)
Supplement: Supplementary Materials — Figure S1: indication of isoelectric point (pI) values for PP2C based on B. rapa chromosomes (Br01-Br10). Figure S2: grand average of hydropathicity (GRAVY) of PP2C genes. Figure S3: the number of exon for the PP2C gene based on B. rapa chromosomes (Br01-Br10). Figure S4: gene structure, the exon-intron, and upstream/downstream region are represented by black boxes and blue boxes, respectively. At the bottom of the figure, the relative position is proportionally displayed based on the kilobase scale. Figure S5: the conserved motifs of PP2C were elucidated by MEME. Different motifs and their positions are represented by different colors, numbered 1–10 at the bottom. Figure S6: the LOGOS of PP2C were also elucidated by MEME online server. Figure S7: the ratios of three subgenomes of B. rapa for PP2C genes. Figure S8: the correlation between Ks and Ka for paralogous gene pairs. Figure S9: phylogenetic relationship of PP2C between B. rapa and A. thaliana. The phylogenetic tree was constructed by MEGA 7 using the Maximum Likelihood Method (1000 bootstrap). Genes of various subgroups of PP2C are marked with different color. Figure S10: phylogenetic relationship of PP2C among other species and A. thaliana. The phylogenetic tree was constructed by MEGA 7 using the Maximum Likelihood Method (1000 bootstrap). Genes of PP2C for different subgroups are marked with different colors. Figure S11: phylogenetic relationship of PP2C among other species and A. thaliana. The phylogenetic tree was constructed by MEGA 7 using the Maximum Likelihood Method (1000 bootstrap). Genes of PP2C for different subgroups are marked with different colors. Figure S12A: heatmap of expression profiles for 29 paralogous pairs in five various tissues: root, stem, leaf, flower, and silique. The Pearson correlation coefficients (PCCs) are also displayed in brackets, while NA indicates no available results for PCC. B. Venn diagram analysis of the tissue expression of paralogous pairs for PP2C. Figure S13: t [file 2965035.f1.zip › Table S5 (1).xlsx]

## Sheet: Table S5
	Table. 5	The FPKM values of PP2C genes in B. rapa
	Gene ID	Root	Stem	Leaf	Flower	Silique
	BraPP2C1	0	0	0	0	0
	BraPP2C2	7.5283	7.04731	1.64867	16.5339	6.68844
	BraPP2C3	43.7254	30.4606	27.5567	40.263	20.9422
	BraPP2C4	26.8696	14.0357	14.7582	31.5413	21.7911
	BraPP2C5	5.02054	5.3476	2.64173	5.57498	7.13722
	BraPP2C6	8.53846	9.97954	6.92171	17.9964	10.644
	BraPP2C7	10.1374	13.5803	7.80461	16.5841	17.7708
	BraPP2C8	7.56861	16.6514	25.1089	21.8715	13.7488
	BraPP2C9	1.97089	1.70928	1.29039	1.26052	1.33861
	BraPP2C10	27.6384	16.4828	17.3575	24.422	14.6778
	BraPP2C11	54.9747	37.7792	43.3156	25.6431	15.3254
	BraPP2C12	24.5373	31.4496	18.6196	34.0382	15.028
	BraPP2C13	0	0	0	0	3.43824
	BraPP2C14	41.3821	17.1392	29.2419	23.2009	11.0084
	BraPP2C15	0	0	0	0	0
	BraPP2C16	0	0	0	0	0
	BraPP2C17	0	0	0	0	0
	BraPP2C18	0	0	0	0.134532	0
	BraPP2C19	0	0	0	0.149289	0
	BraPP2C20	2.34245	0.0705212	0.151602	1.03593	0
	BraPP2C21	71.1705	61.7155	55.5769	22.1468	27.9586
	BraPP2C22	36.6007	41.3254	43.6613	0	0
	BraPP2C23	0.231506	0.11691	0	0	0
	BraPP2C24	100.132	73.3641	64.8742	16.5591	5.20365
	BraPP2C25	0.153807	0	0	0	2.19778
	BraPP2C26	64.7825	64.843	74.8769	70.0226	44.1818
	BraPP2C27	0	0	0	0.668294	0
	BraPP2C28	42.6468	43.5097	28.7948	50.4331	81.4687
	BraPP2C29	18.112	8.60685	9.38028	8.6117	12.3767
	BraPP2C30	42.6976	38.8659	24.5257	29.7315	19.6049
	BraPP2C31	0.279944	0	0.0967601	0.850826	0.267789
	BraPP2C32	2.52171	1.76827	1.87064	5.85423	3.63349
	BraPP2C33	0.130422	0.124567	0	2.37463	0.373323
	BraPP2C34	27.5209	10.4686	11.6598	29.2087	19.0921
	BraPP2C35	3.25827	2.99256	2.5072	2.85007	3.71743
	BraPP2C36	21.3296	26.4821	32.5437	15.1827	7.2146
	BraPP2C37	2.61864	2.00142	0.678176	0.794623	0
	BraPP2C38	0.337343	0.106372	0	0.682971	0
	BraPP2C39	15.9674	5.60941	3.14851	21.1345	10.5386
	BraPP2C40	21.9851	13.3502	11.1757	25.4721	26.0637
	BraPP2C41	0	0.0764232	0.1703	0.332832	0.471543
	BraPP2C42	74.8842	8.6256	5.62327	7.43152	39.3424
	BraPP2C43	4.58036	6.04492	2.87841	3.63525	2.33592
	BraPP2C44	4.02923	3.34872	3.84691	5.2608	7.44849
	BraPP2C45	3.37643	0.581068	0.18429	101.918	1.78546
	BraPP2C46	3.74239	2.51881	0.94653	51.0493	2.48882
	BraPP2C47	0.327438	0	0.11313	0.77351	0.15644
	BraPP2C48	5.12476	1.06733	1.37764	44.993	53.2381
	BraPP2C49	135.193	105.296	48.2202	109.386	71.9406
	BraPP2C50	38.0981	20.6464	28.0242	80.9629	20.2035
	BraPP2C51	0	0	0	0	0.669474
	BraPP2C52	16.4097	10.9627	8.82142	14.0663	9.96632
	BraPP2C53	11.3579	9.03721	5.44298	18.2735	9.44822
	BraPP2C54	18.9136	19.0049	13.4065	41.7009	55.0106
	BraPP2C55	7.01366	11.7465	5.55031	11.5936	18.5397
	BraPP2C56	26.7816	33.0777	20.2138	62.3143	12.4914
	BraPP2C57	4.8911	2.1161	2.96654	15.427	20.1289
	BraPP2C58	13.18	17.5966	11.2945	111.279	46.7594
	BraPP2C59	0	0	0	0	1.42341
	BraPP2C60	0	0.339766	0	0	0
	BraPP2C61	0.422565	0.0676454	0	0	0
	BraPP2C62	9.0774	4.94371	3.40932	8.72608	7.53083
	BraPP2C63	7.4262	4.42921	4.74719	5.70743	1.26973
	BraPP2C64	3.00882	1.36156	0.903463	0.722373	1.9333
	BraPP2C65	50.7369	19.3962	6.67438	5.60234	1.3031
	BraPP2C66	6.25811	9.47344	7.44372	8.85789	24.1678
	BraPP2C67	2.58993	5.51743	3.22326	2.27466	1.61114
	BraPP2C68	3.00505	1.85739	3.66636	11.5532	12.3057
	BraPP2C69	0	0	0	0	0
	BraPP2C70	8.33329	6.92999	13.5477	10.5588	5.52373
	BraPP2C71	12.6425	9.89681	5.79019	9.81854	3.06503
	BraPP2C72	10.3256	3.44191	11.2319	8.84838	10.4864
	BraPP2C73	15.3125	12.0838	7.55185	5.00928	7.77826
	BraPP2C74	0.55478	0.681703	0.230001	2.24651	0
	BraPP2C75	4.68464	0.114095	0.124469	0	0
	BraPP2C76	0	0	0	0	0
	BraPP2C77	20.3355	3.40797	1.04044	0	0.539153
	BraPP2C78	5.62335	0	0	0.464641	0.986559
	BraPP2C79	16.9848	0	0.356802	1.62624	0.328853
	BraPP2C80	10.6679	3.40676	3.12435	9.50634	2.15959
	BraPP2C81	9.71051	20.4794	36.0591	6.6988	0.917836
	BraPP2C82	20.8884	61.6765	95.9528	41.8717	4.25628
	BraPP2C83	6.56892	18.5084	18.548	10.081	7.12334
	BraPP2C84	13.0632	8.38665	6.23948	11.1533	11.2308
	BraPP2C85	0	0	0	0	0
	BraPP2C86	2.00844	0.777257	0.390165	8.38197	1.79718
	BraPP2C87	4.81146	6.62203	8.28436	6.89855	6.90505
	BraPP2C88	1.90643	1.74041	1.69453	3.77121	4.0388
	BraPP2C89	4.03826	7.38521	6.47164	5.20722	2.37068
	BraPP2C90	39.9797	35.7756	47.8944	16.554	9.5623
	BraPP2C91	0	0.0692134	0	0	0
	BraPP2C92	52.2509	79.4356	67.682	40.6734	31.3527
	BraPP2C93	16.6548	42.2256	48.3326	25.0159	18.6755
	BraPP2C94	8.78407	10.8139	9.53678	21.7173	10.2561
	BraPP2C95	4.55238	7.21	34.72	11.0202	14.2082
	BraPP2C96	3.18822	4.0771	7.37658	4.48478	4.52422
	BraPP2C97	0	0	0	1.32437	0
	BraPP2C98	0	0	0	0	0
	BraPP2C99	343.362	110.724	63.2403	9.626	12.0041
	BraPP2C100	245.995	80.5692	48.3611	3.2209	19.6093
	BraPP2C101	2.60331	0.668284	0.537578	0	0
	BraPP2C102	0	0	0	0	0
	BraPP2C103	0.328509	0.775683	0.340498	1.21948	0.470845
	BraPP2C104	0	0	0.282281	0	0.194947
	BraPP2C105	12.8075	9.49652	3.39899	2.179	3.67312
	BraPP2C106	0.858514	0.0788934	0	0	0
	BraPP2C107	0.107137	0	0	0.0543603	0
	BraPP2C108	8.13309	0.328251	0	0.136845	0.388143
	BraPP2C109	42.179	8.0779	3.34114	1.37167	0.185167
	BraPP2C110	3.69026	2.10273	1.66084	2.43135	5.27068
	BraPP2C111	27.6931	6.05408	5.05276	13.6118	10.817
	BraPP2C112	14.3463	11.3846	6.37125	12.0733	12.9796
	BraPP2C113	8.48047	6.04661	2.71273	1.20103	0.638655
	BraPP2C114	7.41784	11.2075	1.62117	3.7645	12.7836
	BraPP2C115	10.219	2.57239	4.58668	5.83573	4.39644
	BraPP2C116	128.366	112.393	69.0404	13.114	49.6647
	BraPP2C117	102.647	49.0957	75.7487	7.75463	9.14939
	BraPP2C118	0	0	0	0	0.167854
	BraPP2C119	9.8968	7.18081	4.59547	1.87917	9.16509
	BraPP2C120	32.3504	49.6819	32.8815	46.4778	32.6777
	BraPP2C121	47.5088	37.5552	27.6358	38.6559	48.7848
	BraPP2C122	30.1423	29.5265	23.8466	41.1311	31.7108
	BraPP2C123	16.8049	31.3628	6.8167	8.03287	7.18347
	BraPP2C124	13.3813	29.7934	19.6282	12.8504	9.09882
	BraPP2C125	0.110225	0.468656	0.571225	0	0
	BraPP2C126	0	1.68395	0.230765	0	0.638159
	BraPP2C127	0	0.691418	0.116542	0	0
	BraPP2C128	7.98729	12.0138	7.09713	5.56728	3.42089
	BraPP2C129	10.9298	19.5085	18.0021	12.3101	8.34933
	BraPP2C130	8.45242	5.98705	2.00589	10.0039	3.06677
	BraPP2C131	12.3598	8.45689	4.76527	27.2064	12.8902
