# Supplementary material for: Genome-Wide Identification, Evolution, and Transcriptional Profiling of PP2C Gene Family in Brassica rapa
Source: Biomed Res Int. 2019 Apr 3;2019:2965035. doi: 10.1155/2019/2965035 (PMC6470454; doi:10.1155/2019/2965035)
Supplement: Supplementary Materials — Figure S1: indication of isoelectric point (pI) values for PP2C based on B. rapa chromosomes (Br01-Br10). Figure S2: grand average of hydropathicity (GRAVY) of PP2C genes. Figure S3: the number of exon for the PP2C gene based on B. rapa chromosomes (Br01-Br10). Figure S4: gene structure, the exon-intron, and upstream/downstream region are represented by black boxes and blue boxes, respectively. At the bottom of the figure, the relative position is proportionally displayed based on the kilobase scale. Figure S5: the conserved motifs of PP2C were elucidated by MEME. Different motifs and their positions are represented by different colors, numbered 1–10 at the bottom. Figure S6: the LOGOS of PP2C were also elucidated by MEME online server. Figure S7: the ratios of three subgenomes of B. rapa for PP2C genes. Figure S8: the correlation between Ks and Ka for paralogous gene pairs. Figure S9: phylogenetic relationship of PP2C between B. rapa and A. thaliana. The phylogenetic tree was constructed by MEGA 7 using the Maximum Likelihood Method (1000 bootstrap). Genes of various subgroups of PP2C are marked with different color. Figure S10: phylogenetic relationship of PP2C among other species and A. thaliana. The phylogenetic tree was constructed by MEGA 7 using the Maximum Likelihood Method (1000 bootstrap). Genes of PP2C for different subgroups are marked with different colors. Figure S11: phylogenetic relationship of PP2C among other species and A. thaliana. The phylogenetic tree was constructed by MEGA 7 using the Maximum Likelihood Method (1000 bootstrap). Genes of PP2C for different subgroups are marked with different colors. Figure S12A: heatmap of expression profiles for 29 paralogous pairs in five various tissues: root, stem, leaf, flower, and silique. The Pearson correlation coefficients (PCCs) are also displayed in brackets, while NA indicates no available results for PCC. B. Venn diagram analysis of the tissue expression of paralogous pairs for PP2C. Figure S13: t [file 2965035.f1.zip › Table S6 (2).xlsx]

## Sheet: Table S6
Table. 6	Syntenic paralog pairs of BraPP2C with PC and FPKM values
Gene ID	Root	Stem	Leaf	Flower	Silique
BraPP2C2_BraPP2C1 (NA)	3.76415	3.52366	0.824335	8.26695	3.34422
BraPP2C4_BraPP2C3 (0.646785)	35.2975	22.2481	21.1575	35.9021	21.3666
BraPP2C11_BraPP2C12 (0.135572)	39.756	34.6144	30.9676	29.8407	15.1767
BraPP2C23_BraPP2C21 (0.792096)	35.701	30.9162	27.7885	11.0734	13.9793
BraPP2C27_BraPP2C26 (0.299903)	32.3912	32.4215	37.4385	35.3454	22.0909
BraPP2C37_BraPP2C38 (0.215102)	1.47799	1.0539	0.339088	0.738797	0
BraPP2C40_BraPP2C39 (0.822344)	18.9763	9.4798	7.16211	23.3033	18.3011
BraPP2C42_BraPP2C41 (-0.25689)	37.4421	4.35101	2.89678	3.88218	19.907
BraPP2C52_BraPP2C53 (0.667919)	13.8838	9.99995	7.1322	16.1699	9.70727
BraPP2C58_BraPP2C56 (0.766975)	19.9808	25.3372	15.7541	86.7966	29.6254
BraPP2C60_BraPP2C61 (-0.09247)	0.211283	0.203706	0	0	0
BraPP2C62_BraPP2C63 (0.269468)	8.2518	4.68646	4.07826	7.21675	4.40028
BraPP2C66_BraPP2C67 (-0.44263)	4.42402	7.49544	5.33349	5.56627	12.8895
BraPP2C72_BraPP2C71 (-0.35097)	11.484	6.66936	8.51104	9.33346	6.77571
BraPP2C77_BraPP2C76 (NA)	10.1677	1.70399	0.52022	0	0.269576
BraPP2C78_BraPP2C79 (0.985279)	11.3041	0	0.178401	1.04544	0.657706
BraPP2C82_BraPP2C81 (0.953128)	15.2995	41.078	66.0059	24.2852	2.58706
BraPP2C85_BraPP2C86 (NA)	1.00422	0.388628	0.195082	4.19099	0.89859
BraPP2C88_BraPP2C87 (0.080748)	3.35895	4.18122	4.98944	5.33488	5.47193
BraPP2C91_BraPP2C92 (0.719683)	26.1255	39.7524	33.841	20.3367	15.6763
BraPP2C104_BraPP2C102 (NA)	0	0	0.141141	0	0.0974735
BraPP2C110_BraPP2C109 (0.148191)	22.9346	5.09032	2.50099	1.90151	2.72792
BraPP2C114_BraPP2C113 (0.115637)	7.94916	8.62706	2.16695	2.48277	6.71113
BraPP2C117_BraPP2C116 (0.807709)	115.507	80.7443	72.3946	10.4343	29.407
BraPP2C122 _BraPP2C121 (0.364012)	38.8255	33.5408	25.7412	39.8935	40.2478
BraPP2C124_BraPP2C123 (0.795616)	15.0931	30.5781	13.2225	10.4416	8.14114
BraPP2C125_BraPP2C127 (0.628946)	0.0551125	0.580037	0.343884	0	0
BraPP2C129_BraPP2C128 (0.787801)	9.45855	15.7612	12.5496	8.93869	5.88511
BraPP2C130_BraPP2C131 (0.762137)	10.4061	7.22197	3.38558	18.6051	7.97849
