# Supplementary material for: Genome-Wide Identification, Evolution, and Transcriptional Profiling of PP2C Gene Family in Brassica rapa
Source: Biomed Res Int. 2019 Apr 3;2019:2965035. doi: 10.1155/2019/2965035 (PMC6470454; doi:10.1155/2019/2965035)
Supplement: Supplementary Materials — Figure S1: indication of isoelectric point (pI) values for PP2C based on B. rapa chromosomes (Br01-Br10). Figure S2: grand average of hydropathicity (GRAVY) of PP2C genes. Figure S3: the number of exon for the PP2C gene based on B. rapa chromosomes (Br01-Br10). Figure S4: gene structure, the exon-intron, and upstream/downstream region are represented by black boxes and blue boxes, respectively. At the bottom of the figure, the relative position is proportionally displayed based on the kilobase scale. Figure S5: the conserved motifs of PP2C were elucidated by MEME. Different motifs and their positions are represented by different colors, numbered 1–10 at the bottom. Figure S6: the LOGOS of PP2C were also elucidated by MEME online server. Figure S7: the ratios of three subgenomes of B. rapa for PP2C genes. Figure S8: the correlation between Ks and Ka for paralogous gene pairs. Figure S9: phylogenetic relationship of PP2C between B. rapa and A. thaliana. The phylogenetic tree was constructed by MEGA 7 using the Maximum Likelihood Method (1000 bootstrap). Genes of various subgroups of PP2C are marked with different color. Figure S10: phylogenetic relationship of PP2C among other species and A. thaliana. The phylogenetic tree was constructed by MEGA 7 using the Maximum Likelihood Method (1000 bootstrap). Genes of PP2C for different subgroups are marked with different colors. Figure S11: phylogenetic relationship of PP2C among other species and A. thaliana. The phylogenetic tree was constructed by MEGA 7 using the Maximum Likelihood Method (1000 bootstrap). Genes of PP2C for different subgroups are marked with different colors. Figure S12A: heatmap of expression profiles for 29 paralogous pairs in five various tissues: root, stem, leaf, flower, and silique. The Pearson correlation coefficients (PCCs) are also displayed in brackets, while NA indicates no available results for PCC. B. Venn diagram analysis of the tissue expression of paralogous pairs for PP2C. Figure S13: t [file 2965035.f1.zip › Table S7 (1).xlsx]

## Sheet: Table S7
Table. 7	Cis-Elements of PP2C genes in Brassica rapa
	Cis-Elements	Functions	BraPP2C1	BraPP2C2	BraPP2C3	BraPP2C4	BraPP2C5	BraPP2C6	BraPP2C7	BraPP2C8	BraPP2C9	BraPP2C10	BraPP2C11	BraPP2C12	BraPP2C13	BraPP2C14	BraPP2C15	BraPP2C16	BraPP2C17	BraPP2C18	BraPP2C19	BraPP2C20	BraPP2C21	BraPP2C22	BraPP2C23	BraPP2C24	BraPP2C25	BraPP2C26	BraPP2C27	BraPP2C29	BraPP2C30	BraPP2C31	BraPP2C32	BraPP2C33	BraPP2C34	BraPP2C35	BraPP2C36	BraPP2C37	BraPP2C38	BraPP2C39	BraPP2C40	BraPP2C41	BraPP2C42	BraPP2C43	BraPP2C44	BraPP2C45	BraPP2C46	BraPP2C47	BraPP2C48
Hormones	CGTCA-motif	cis-acting regulatory element involved in the MeJA-responsiveness	+	+			+	+	+	+			+	+	+	+	+	+			+			+	+	+	+			+	+	+	+	+	+	+	+	+	+	+		+	+	+	+	+	+		+
	TGACG-motif	cis-acting regulatory element involved in the MeJA-responsiveness	+	+			+	+	+			+	+	+	+	+	+	+			+		+	+	+	+	+			+	+	+	+	+	+	+	+	+	+	+		+	+	+	+	+	+		+
	ERE-motif	ethylene-responsive element																									+								+
	GARE-motif	gibberellin-responsive element	+		+								+	+				+		+	+					+				+				+		+
	P-BOX	gibberellin-responsive element	+									+			+		+	+		+		+		+					+	+	+					+		+	+					+	+			+	+
	TATC-Box	cis-acting element involved in gibberellin-responsiveness	+							+			+										+											+	+	+											+
	ABRE	cis-acting element involved in the abscisic acid responsiveness	+		+			+	+						+		+	+		+	+	+	+	+	+	+	+	+		+	+		+	+		+	+	+		+		+	+	+	+	+	+	+	+
	motif IIb	abscisic acid responsive element
	AuxRR-Core	cis-acting regulatory element involved in auxin responsiveness																				+
	TGA-Box	part of an auxin-responsive element				+																						+
	TGA-Element	auxin-responsive element		+	+				+	+		+			+		+													+	+		+				+			+		+			+
	AuxRE	part of an auxin-responsive element																																									+				+
	SARE	cis-acting element involved in salicylic acid responsiveness
	TCA-Element	cis-acting element involved in salicylic acid responsiveness							+							+	+					+	+					+	+	+	+				+			+		+						+	+
Light	AE-BOX	part of a module for light response	+				+						+				+	+		+	+					+	+							+					+
	BOX-4	part of a conserved DNA module involved in light responsiveness	+	+	+			+	+			+		+		+			+		+	+	+		+		+	+	+	+		+	+			+	+		+	+	+	+	+	+	+	+	+	+	+
	Box I	light responsive element					+
	CATT-motifs	part of a light responsive element
	Gap-Box	part of a light responsive element					+								+	+				+					+																						+		+
	I-Box	part of a light responsive element		+			+		+	+								+															+							+			+	+					+
	L-Box	part of a light responsive element																				+
	LAMP-ELEMENTS	part of a light responsive element				+	+																		+
	TCT-motifs	part of a light responsive element	+	+	+			+									+	+			+	+	+				+					+	+	+		+	+	+	+					+	+	+		+	+
	4cl-CMA2b	light responsive element
	GT1-motif	light responsive element	+	+				+	+	+		+									+				+		+	+		+	+		+	+		+		+	+	+	+					+	+		+
	MRE	MYB binding site involved in light responsiveness	+	+			+						+	+			+	+		+	+					+		+					+		+							+					+	+
	3-AFI Binding site	light responsive element											+																	+									+		+
	ACE	cis-acting element involved in light responsiveness																																		+	+												+
	AT1-motif	light responsive element			+									+
	G-Box	cis-acting regulatory element involved in light responsiveness	+		+			+	+						+		+	+		+		+	+	+	+	+	+	+		+	+		+	+	+	+	+	+		+		+	+	+	+	+	+		+
	GA-motif	part of a light responsive element					+																												+						+						+
	GAG-motif	part of a light responsive element															+					+						+		+
	GATA-motif	part of a light responsive element				+	+	+	+	+			+		+									+		+			+							+												+
	Sp1	part of a light responsive element				+																																	+			+
	as-2-Box	involved in shoot-specific expression and light responsiveness
	Box II	part of a light responsive element								+
	ATCT-motif	part of a conserved DNA module involved in light responsiveness					+							+					+		+			+																+			+				+
	TCCC-motif	part of a light responsive element			+							+	+							+			+		+													+							+	+	+	+	+
	C-Box	cis-acting regulatory element involved in light responsiveness
	chs-CMAIa	part of a light responsive element								+								+												+														+					+
	chs-Unit 1 m1	part of a light responsive element																	+														+
	ATC-motif	part of a conserved DNA module involved in light responsiveness					+																																+
	CG-motif	part of a light responsive element
	GATT-motif	part of a light responsive element						+
	rbcS-CMA7a	part of a light responsive element
	MNF1	light responsive element
	chs-CMA2b	part of a light responsive element
	CAG-motif	part of a light responsive element
	4cl-CMA1b	part of a light responsive element
	ATCC-motif	part of a conserved DNA module involved in light responsiveness
	LS7	part of a light responsive element
	TGG-motif	part of a light responsive element
	chs-CMA2a	part of a light responsive element														+				+				+																				+		+
	GTGGC-motif	part of a light responsive element
	AAAC-motif	light responsive element											+																	+
	H-box	cis-acting regulatory element involved in light responsiveness
	OBP-1 site	cis-acting regulatory element
	sbp-CMA1c	part of a light responsive element
	Box II -like sequence	cis-acting regulatory element							+																														+
	ACA-motif	part of gapA in (gapA-CMA1) involved with light responsiveness									+
	TGGCA	part of a light responsive element
Essential Element	CAAT-BOX	common cis-acting element in promoter and enhancer regions	+	+	+	+	+	+	+	+	+	+	+	+	+	+	+	+	+	+	+	+	+	+		+	+	+	+	+	+	+	+	+	+	+	+	+	+	+	+	+	+	+	+	+	+	+	+
	TATA-BOX	core promoter element around -30 of transcription start	+	+		+	+	+	+	+	+	+	+	+	+	+	+	+	+	+	+	+	+	+	+	+	+	+	+	+	+	+	+	+	+	+	+	+	+		+	+	+	+	+		+	+	+
					+
Enhancer	5UTR Py-rich stretch	cis-acting element conferring high transcription levels
	TA-Rich Region	Enhancer
	GC-motif	enhancer-like element involved in anoxic specific inducibility																																					+
							+
Stresses	HSE	cis-acting element involved in heat stress responsiveness
	MBS	MYB binding site involved in drought-inducibility		+	+	+				+		+			+	+				+		+	+			+			+	+	+					+	+	+			+							+
	Skn-1-motif	cis-acting regulatory element required for endosperm expression
	TC-Rich repeats	cis-acting element involved in defense and stress responsiveness	+		+				+			+		+				+			+	+	+						+	+	+	+						+			+	+				+
	LTR	cis-acting element involved in low-temperature responsiveness	+			+	+					+		+				+	+	+	+		+	+	+				+	+			+	+	+	+					+	+	+	+			+
	WUN-motif	wound-responsive element
	MBSII	MYB binding site involved in flavonoid biosynthetic genes regulation
	MBSI	MYB binding site involved in flavonoid biosynthetic genes regulation			+													+	+																								+
	DRE	"cis-acting element involved in dehydration, low-temp, salt stresses
Other regulatory Stress Factors	ARE	cis-acting regulatory element essential for the anaerobic induction	+			+	+		+	+	+	+		+	+		+	+	+	+	+	+	+	+	+		+	+	+	+		+	+	+	+	+	+	+	+		+		+	+	+	+	+		+
	Box-W1	fungal elicitor responsive element
	AT-Rich Sequence	MYBHv1 binding site									+					+			+																												+
	ELI-Box3	elicitor-responsive element
	CCAAT-Box	MYBHv1 binding site		+		+			+						+									+	+									+	+			+		+						+	+		+
	HD-ZIP 3	protein binding site																																			+
	MSA-Like	cis-acting element involved in cell cycle regulation							+												+									+			+
	BOX III	protein binding site																+						+
	CAT-BOX	cis-acting regulatory element related to meristem expression				+									+			+	+						+				+							+		+	+			+		+
	RY-Element	cis-acting regulatory element involved in seed-specific regulation																						+
	o2-site	cis-acting regulatory element involved in zein metabolism regulation								+								+			+		+	+		+		+				+		+	+	+	+						+
	as1	cis-acting regulatory element involved in the root-specific expression
	AT-Rich Element	binding site of AT-rich DNA binding protein (ATBP-1)						+									+		+	+																					+				+
	GCN4-motif	cis-regulatory element involved in endosperm expression		+						+			+		+			+																+
	HD-ZIP 1	element involved in differentiation of the palisade mesophyll cells																								+
	HD-ZIP 2	element involved in the control of leaf morphology development
	OCT	cis-acting regulatory element related to meristem specific activation
	3-AF3 binding site	part of a conserved DNA module array
	A-Box	cis-acting regulatory element							+								+	+						+			+	+		+			+			+		+	+	+	+		+
	CCGTCC-Box	cis-acting regulatory element related to meristem specific activation
	motif I	cis-acting regulatory element root specific
	AACA-motif	involved in endosperm-specific negative expression
	OBP-site	cis-acting regulatory element
	CE3	cis-acting element involved in ABA and VP1 responsiveness
	dOCT	cis-acting regulatory element related to meristem specific activation
	ATGCAAAT motif	cis-acting regulatory element associated to the TGAGTCA motif
	HMG-TATA-region	cis-acting regulatory element
	EIRE	elicitor-responsive element
Circadian	Circadian	cis-acting regulatory element involved in circadian control								+									+			+	+						+					+			+												+
[truncated: 78 more columns]
