# Supplementary material for: Genome-Wide Identification, Evolution, and Transcriptional Profiling of PP2C Gene Family in Brassica rapa
Source: Biomed Res Int. 2019 Apr 3;2019:2965035. doi: 10.1155/2019/2965035 (PMC6470454; doi:10.1155/2019/2965035)
Supplement: Supplementary Materials — Figure S1: indication of isoelectric point (pI) values for PP2C based on B. rapa chromosomes (Br01-Br10). Figure S2: grand average of hydropathicity (GRAVY) of PP2C genes. Figure S3: the number of exon for the PP2C gene based on B. rapa chromosomes (Br01-Br10). Figure S4: gene structure, the exon-intron, and upstream/downstream region are represented by black boxes and blue boxes, respectively. At the bottom of the figure, the relative position is proportionally displayed based on the kilobase scale. Figure S5: the conserved motifs of PP2C were elucidated by MEME. Different motifs and their positions are represented by different colors, numbered 1–10 at the bottom. Figure S6: the LOGOS of PP2C were also elucidated by MEME online server. Figure S7: the ratios of three subgenomes of B. rapa for PP2C genes. Figure S8: the correlation between Ks and Ka for paralogous gene pairs. Figure S9: phylogenetic relationship of PP2C between B. rapa and A. thaliana. The phylogenetic tree was constructed by MEGA 7 using the Maximum Likelihood Method (1000 bootstrap). Genes of various subgroups of PP2C are marked with different color. Figure S10: phylogenetic relationship of PP2C among other species and A. thaliana. The phylogenetic tree was constructed by MEGA 7 using the Maximum Likelihood Method (1000 bootstrap). Genes of PP2C for different subgroups are marked with different colors. Figure S11: phylogenetic relationship of PP2C among other species and A. thaliana. The phylogenetic tree was constructed by MEGA 7 using the Maximum Likelihood Method (1000 bootstrap). Genes of PP2C for different subgroups are marked with different colors. Figure S12A: heatmap of expression profiles for 29 paralogous pairs in five various tissues: root, stem, leaf, flower, and silique. The Pearson correlation coefficients (PCCs) are also displayed in brackets, while NA indicates no available results for PCC. B. Venn diagram analysis of the tissue expression of paralogous pairs for PP2C. Figure S13: t [file 2965035.f1.zip › Table S8 (1).xlsx]

## Sheet: Table S8
Table. 8	Relative Expression pattern of BraPP2C genes along with PC values with respect to various treatments by qRT-PCR
Gene	Heat-1	Heat-6	Heat-12	Pearson Correlation		Gene	Cold-1	Cold-6	Cold-12	Pearson Correlation		Gene	ABA-1	ABA-6	ABA-12	Pearson Correlation		Gene	PEG-1	PEG-6	PEG-12	Pearson Correlation
BraPP2C2	0.0311036	40.052	0.19628			BraPP2C2	0.24507	1.26018	1.51586			BraPP2C2	1.22232	0.14235	50.3852			BraPP2C2	19.898	1.49902	29.7153
BraPP2C1	0.000937798	0.497217	0.00489684	0.999994		BraPP2C1	0.124854	0.157973	0.0491916	-0.401749		BraPP2C1	0.295611	0.00543199	0.303924	0.536993		BraPP2C1	1.10776	0.0777008	0.0110358	0.1193
BraPP2C56	0.0990689	1.20657	0.0782205			BraPP2C56	2.54166	1.26264	1.98403			BraPP2C56	0.785616	3123.48	4.76101			BraPP2C56	432.266	24.599	0.30288
BraPP2C58	399.215	1.25876	0.0310376	-0.483617		BraPP2C58	3.19042	0.758298	5.02718	0.627028		BraPP2C58	0.726583	1.86557	4.80545	-0.245943		BraPP2C58	130.628	50.6865	0.240239	0.94153
BraPP2C66	0.0781424	6.276	0.00963321			BraPP2C66	3.14215	1.89726	9.96485			BraPP2C66	3.95551	5064.05	6.11506			BraPP2C66	2181.71	4.92961	2.50075
BraPP2C67	0.00077881	0.0243938	0.000973819	0.999861		BraPP2C67	0.0156545	0.00584608	0.078918	0.999803		BraPP2C67	0.0149239	0.00627421	31.1913	-0.499888		BraPP2C67	10.8704	0.199079	0.00779442	0.999896
BraPP2C72	0.002443	0.236587	0.0394135			BraPP2C72	0.313358	1.2605	0.311532			BraPP2C72	313.566	0.399614	396.861			BraPP2C72	52.2679	0.618229	0.157283
BraPP2C71	0.0246974	0.292294	0.199463	0.851907		BraPP2C71	2.00009	2.53191	6.31992	-0.400571		BraPP2C71	0.300787	0.190626	3.02091	0.687858		BraPP2C71	82.8906	1.97057	4.02648	0.999551
BraPP2C77	2.49977	0.923064	1.58012			BraPP2C77	16.0123	0.973107	12.5149			BraPP2C77	855.944	10.1997	3.91604			BraPP2C77	31.468	7.82544	16.0164
BraPP2C76	0.999286	0.376097	5.04104	0.027481		BraPP2C76	1.25625	1.59958	3.97903	0.182477		BraPP2C76	0.9994	3.18491	6.33601	-0.813137		BraPP2C76	27.1041	3.11719	8.02488	0.988282
BraPP2C78	6.44264	0.9728	6.39725			BraPP2C78	0.396403	4.04035	3.15582			BraPP2C78	3.12494	1.0053	6.36641			BraPP2C78	68.7697	3.06341	5.68328
BraPP2C79	16.1631	1.95677	4.02471	0.617802		BraPP2C79	0.123759	7.98935	0.979417	0.756368		BraPP2C79	3.17919	1.60954	868.233	0.920359		BraPP2C79	16.8594	0.616107	1.25383	1
BraPP2C82	20.4753	0.486413	1.60045			BraPP2C82	0.393929	6.40424	3.1212			BraPP2C82	2.51161	1.0154	4.9721			BraPP2C82	26.7017	0.773972	0.978092
BraPP2C81	1.58781	0.311895	1.00208	0.867215		BraPP2C81	0.39293	1.58665	2.46929	0.528256		BraPP2C81	0.396762	1.00673	3.93139	0.85464		BraPP2C81	8.29826	0.362874	1.96437	0.982908
BraPP2C85	0.0785103	0.313921	0.098956			BraPP2C85	0.624377	0.249836	3.95121			BraPP2C85	0.795506	0.154614	0.948692			BraPP2C85	6.81183	0.389793	0.78109
BraPP2C86	0.099183	1.26122	0.000559193	0.988941		BraPP2C86	0.024247	0.0984052	2.49108	0.992991		BraPP2C86	0.793915	0.194035	3.16417	0.782451		BraPP2C86	4.26451	2.35714	0.377226	0.831637
BraPP2C88	0.201253	0.0151899	0.0199801			BraPP2C88	0.108852	0.0249316	0.504388			BraPP2C88	0.252742	0.127399	1.60785			BraPP2C88	1.65426	7.99569	0.00565409
BraPP2C87	0.0120496	0.123607	0.0248679	-0.606274		BraPP2C87	0.000189956	0.0777877	18.0125	0.985862		BraPP2C87	0.63136	0.642273	2.53941	0.99669		BraPP2C87	4.17604	2.44271	0.19491	0.26783
BraPP2C91	0.127521	0.00353893	0.20091			BraPP2C91	0.10447	0.251469	0.311644			BraPP2C91	0.762859	0.805381	1.27251			BraPP2C91	5.11928	95.0015	0.211787
BraPP2C92	0.0119832	0.0595802	5.61248	0.778878		BraPP2C92	29.0344	3.98828	1.92712	-0.976363		BraPP2C92	7.93808	80.6952	7.82228	-0.434711		BraPP2C92	66.9062	1.47308	0.488374	-0.448127
BraPP2C104	0.0026352	0.107653	0.0438357			BraPP2C104	2.25824	1.41757	0.831117			BraPP2C104	5.62444	58.6984	7.07923			BraPP2C104	30.6815	0.664281	0.139642
BraPP2C102	0.0119232	3.92472	0.00385206	0.920405		BraPP2C102	0.193182	8.01979	1.20909	-0.220303		BraPP2C102	20.1576	125.614	50.2697	0.967212		BraPP2C102	274.58	24.1645	0.984794	0.998112
BraPP2C110	0.0510178	3.28312	1.31529			BraPP2C110	1.00373	0.820439	16.7337			BraPP2C110	26.6171	26.7511	83.6183			BraPP2C110	447.318	50.6311	16.9697
BraPP2C109	0.00146829	17.7948	4.39511e-06	0.921586		BraPP2C109	0.134411	0.00115072	0.0759116	0.0802816		BraPP2C109	0.00366135	0.0093182	0.0459786	0.992641		BraPP2C109	0.194804	0.035199	0.0239758	0.999933
BraPP2C114	0.00121022	34.9128	0.000241971			BraPP2C114	148.374	0.158741	2.5847			BraPP2C114	0.092807	0.159005	4.04671			BraPP2C114	17.2195	1.62189	1.64229
BraPP2C113	0.206686	176.137	0.000498028	1		BraPP2C113	0.122288	0.325773	363.05	-0.487997		BraPP2C113	0.16261	0.07698	4.10952	0.999449		BraPP2C113	6.89362	0.819273	0.101957	0.99526
BraPP2C117	0.816484	8096.68	0.00313293			BraPP2C117	0.814903	1.61764	5.07903			BraPP2C117	3.17687	0.294014	1.96883			BraPP2C117	140.899	52096.6	0.249622
BraPP2C116	0.158795	1.99662	0.200065	0.999805		BraPP2C116	0.796923	0.38966	1.51363	0.855627		BraPP2C116	0.307517	0.122935	0.501924	0.566163		BraPP2C116	15.821	0.755643	0.0974103	-0.46554
BraPP2C125	0.0315428	0.150209	0.500871			BraPP2C125	4.00567	3.21224	25.1525			BraPP2C125	1.5587	0.0996569	0.958438			BraPP2C125	16.3891	1.98732	0.0145796
BraPP2C127	0.0196696	0.946685	0.012332	-0.280994		BraPP2C127	0.941592	1.25963	0.788658	-0.770346		BraPP2C127	0.249675	0.504035	3.09249	0.0210031		BraPP2C127	15.4503	1.03135	0.187901	0.998116
