# Supplementary material for: Genome-Wide Identification, Evolution, and Transcriptional Profiling of PP2C Gene Family in Brassica rapa
Source: Biomed Res Int. 2019 Apr 3;2019:2965035. doi: 10.1155/2019/2965035 (PMC6470454; doi:10.1155/2019/2965035)
Supplement: Supplementary Materials — Figure S1: indication of isoelectric point (pI) values for PP2C based on B. rapa chromosomes (Br01-Br10). Figure S2: grand average of hydropathicity (GRAVY) of PP2C genes. Figure S3: the number of exon for the PP2C gene based on B. rapa chromosomes (Br01-Br10). Figure S4: gene structure, the exon-intron, and upstream/downstream region are represented by black boxes and blue boxes, respectively. At the bottom of the figure, the relative position is proportionally displayed based on the kilobase scale. Figure S5: the conserved motifs of PP2C were elucidated by MEME. Different motifs and their positions are represented by different colors, numbered 1–10 at the bottom. Figure S6: the LOGOS of PP2C were also elucidated by MEME online server. Figure S7: the ratios of three subgenomes of B. rapa for PP2C genes. Figure S8: the correlation between Ks and Ka for paralogous gene pairs. Figure S9: phylogenetic relationship of PP2C between B. rapa and A. thaliana. The phylogenetic tree was constructed by MEGA 7 using the Maximum Likelihood Method (1000 bootstrap). Genes of various subgroups of PP2C are marked with different color. Figure S10: phylogenetic relationship of PP2C among other species and A. thaliana. The phylogenetic tree was constructed by MEGA 7 using the Maximum Likelihood Method (1000 bootstrap). Genes of PP2C for different subgroups are marked with different colors. Figure S11: phylogenetic relationship of PP2C among other species and A. thaliana. The phylogenetic tree was constructed by MEGA 7 using the Maximum Likelihood Method (1000 bootstrap). Genes of PP2C for different subgroups are marked with different colors. Figure S12A: heatmap of expression profiles for 29 paralogous pairs in five various tissues: root, stem, leaf, flower, and silique. The Pearson correlation coefficients (PCCs) are also displayed in brackets, while NA indicates no available results for PCC. B. Venn diagram analysis of the tissue expression of paralogous pairs for PP2C. Figure S13: t [file 2965035.f1.zip › Table S9 (1).xlsx]

## Sheet: Table S9
Table. 9	Pearson correlation coefficient of the stress-induced PP2C genes in Brassica rapa
Heat and Cold stresses	Gene 1	Gene 2	Correlation Coefficient
Heat (Highly Positive)	BraPP2C2	BraPP2C1	0.999994
	BraPP2C66	BraPP2C67	0.999861
	BraPP2C72	BraPP2C71	0.851907
	BraPP2C78	BraPP2C79	0.617802
	BraPP2C82	BraPP2C81	0.867215
	BraPP2C85	BraPP2C86	0.988941
	BraPP2C91	BraPP2C92	0.778878
	BraPP2C104	BraPP2C102	0.920405
	BraPP2C110	BraPP2C109	0.921586
	BraPP2C114	BraPP2C113	1
	BraPP2C117	BraPP2C116	0.999805
Heat (Mild Positive)	BraPP2C77	BraPP2C76	0.027481
Heat (Negative)	BraPP2C56	BraPP2C58	-0.483617
	BraPP2C88	BraPP2C87	-0.606274
	BraPP2C125	BraPP2C127	-0.280994
Cold (Highly Positive)	BraPP2C56	BraPP2C58	0.627028
	BraPP2C66	BraPP2C67	0.999803
	BraPP2C78	BraPP2C79	0.756368
	BraPP2C82	BraPP2C81	0.528256
	BraPP2C85	BraPP2C86	0.992991
	BraPP2C88	BraPP2C87	0.985862
	BraPP2C117	BraPP2C116	0.855627
Cold (Mild Positive)	BraPP2C77	BraPP2C76	0.182477
	BraPP2C110	BraPP2C109	0.0802816
Cold (Negative)	BraPP2C2	BraPP2C1	-0.401749
	BraPP2C72	BraPP2C71	-0.400571
	BraPP2C91	BraPP2C92	-0.976363
	BraPP2C104	BraPP2C102	-0.220303
	BraPP2C114	BraPP2C113	-0.487997
	BraPP2C125	BraPP2C127	-0.770346
ABA (Highly Positive)	BraPP2C2	BraPP2C1	0.536993
	BraPP2C72	BraPP2C71	0.687858
	BraPP2C78	BraPP2C79	0.920359
	BraPP2C82	BraPP2C81	0.85464
	BraPP2C85	BraPP2C86	0.782451
	BraPP2C88	BraPP2C87	0.99669
	BraPP2C104	BraPP2C102	0.967212
	BraPP2C110	BraPP2C109	0.992641
	BraPP2C114	BraPP2C113	0.999449
	BraPP2C117	BraPP2C116	0.566163
ABA (Mild Positive)	BraPP2C125	BraPP2C127	0.0210031
ABA (Negative)	BraPP2C56	BraPP2C58	-0.245943
	BraPP2C66	BraPP2C67	-0.499888
	BraPP2C77	BraPP2C76	-0.813137
	BraPP2C91	BraPP2C92	-0.434711
PEG (Highly Positive)	BraPP2C56	BraPP2C58	0.94153
	BraPP2C66	BraPP2C67	0.999896
	BraPP2C72	BraPP2C71	0.999551
	BraPP2C77	BraPP2C76	0.988282
	BraPP2C78	BraPP2C79	1
	BraPP2C82	BraPP2C81	0.982908
	BraPP2C85	BraPP2C86	0.831637
	BraPP2C104	BraPP2C102	0.998112
	BraPP2C110	BraPP2C109	0.999933
	BraPP2C114	BraPP2C113	0.99526
	BraPP2C125	BraPP2C127	0.998116
PEG (Mild Positive)	BraPP2C2	BraPP2C1	0.1193
	BraPP2C88	BraPP2C87	0.26783
PEG (Negative)	BraPP2C91	BraPP2C92	-0.448127
	BraPP2C117	BraPP2C116	-0.46554
