# Supplementary material for: Genome-Wide Identification, Evolution, and Transcriptional Profiling of PP2C Gene Family in Brassica rapa
Source: Biomed Res Int. 2019 Apr 3;2019:2965035. doi: 10.1155/2019/2965035 (PMC6470454; doi:10.1155/2019/2965035)
Supplement: Supplementary Materials — Figure S1: indication of isoelectric point (pI) values for PP2C based on B. rapa chromosomes (Br01-Br10). Figure S2: grand average of hydropathicity (GRAVY) of PP2C genes. Figure S3: the number of exon for the PP2C gene based on B. rapa chromosomes (Br01-Br10). Figure S4: gene structure, the exon-intron, and upstream/downstream region are represented by black boxes and blue boxes, respectively. At the bottom of the figure, the relative position is proportionally displayed based on the kilobase scale. Figure S5: the conserved motifs of PP2C were elucidated by MEME. Different motifs and their positions are represented by different colors, numbered 1–10 at the bottom. Figure S6: the LOGOS of PP2C were also elucidated by MEME online server. Figure S7: the ratios of three subgenomes of B. rapa for PP2C genes. Figure S8: the correlation between Ks and Ka for paralogous gene pairs. Figure S9: phylogenetic relationship of PP2C between B. rapa and A. thaliana. The phylogenetic tree was constructed by MEGA 7 using the Maximum Likelihood Method (1000 bootstrap). Genes of various subgroups of PP2C are marked with different color. Figure S10: phylogenetic relationship of PP2C among other species and A. thaliana. The phylogenetic tree was constructed by MEGA 7 using the Maximum Likelihood Method (1000 bootstrap). Genes of PP2C for different subgroups are marked with different colors. Figure S11: phylogenetic relationship of PP2C among other species and A. thaliana. The phylogenetic tree was constructed by MEGA 7 using the Maximum Likelihood Method (1000 bootstrap). Genes of PP2C for different subgroups are marked with different colors. Figure S12A: heatmap of expression profiles for 29 paralogous pairs in five various tissues: root, stem, leaf, flower, and silique. The Pearson correlation coefficients (PCCs) are also displayed in brackets, while NA indicates no available results for PCC. B. Venn diagram analysis of the tissue expression of paralogous pairs for PP2C. Figure S13: t [file 2965035.f1.zip › Table S10 (1).xlsx]

## Sheet: Table S10
Table 10: Information of PP2C genes in 10 plants in this work.
Amborella trichopoda		Capsella rubella		Carica papaya		Fragaria vesca		Physcomitrella patens		Vitis vinifera		Solanum lycopersicum		Arabidopsis Iyarta		Citrus sinensis		Populus trichocarpa
evm_27.model.AmTr_v1.0_scaffold00163.14		Carubv10009076m		evm.model.supercontig_34.127		mrna10291.1-v1.0-hybrid		Pp3c14_25570V3.2.p		GSVIVT01030553001		Solyc07g054300.2.1		AL1G13090.t1		orange1.1g012145m		Potri.013G144100.2.p
evm_27.model.AmTr_v1.0_scaffold00023.47		Carubv10009068m		evm.model.supercontig_12.47		mrna16814.1-v1.0-hybrid		Pp3c14_25570V3.1.p		GSVIVT01019076001		Solyc10g008490.2.1		AL6G49480.t1		orange1.1g012129m		Potri.013G144100.3.p
evm_27.model.AmTr_v1.0_scaffold00012.311		Carubv10000888m		evm.model.supercontig_2.433		mrna13799.1-v1.0-hybrid		Pp3c14_25560V3.2.p		GSVIVT01014860001		Solyc07g066260.2.1		AL3G12160.t1		orange1.1g013376m		Potri.013G144100.1.p
evm_27.model.AmTr_v1.0_scaffold00012.126		Carubv10013536m		evm.model.supercontig_19.159		mrna07939.1-v1.0-hybrid		Pp3c14_25560V3.1.p		GSVIVT01024875001		Solyc05g055790.2.1		AL2G40320.t1		orange1.1g020913m		Potri.019G103100.3.p
evm_27.model.AmTr_v1.0_scaffold00149.43		Carubv10013532m		evm.model.supercontig_81.90		mrna01934.1-v1.0-hybrid		Pp3c2_2880V3.10.p		GSVIVT01024976001		Solyc10g005640.2.1		AL1G28340.t1		orange1.1g011209m		Potri.019G103100.7.p
evm_27.model.AmTr_v1.0_scaffold00079.109		Carubv10021735m		evm.model.supercontig_19.272		mrna26316.1-v1.0-hybrid		Pp3c2_2880V3.9.p		GSVIVT01034176001		Solyc04g056560.2.1		AL7G45180.t1		orange1.1g011218m		Potri.019G103100.6.p
evm_27.model.AmTr_v1.0_scaffold00057.71		Carubv10011374m		evm.model.supercontig_81.156		mrna14105.1-v1.0-hybrid		Pp3c2_2880V3.8.p		GSVIVT01031195001		Solyc06g082080.2.1		AL1G17580.t1		orange1.1g011968m		Potri.019G103100.9.p
evm_27.model.AmTr_v1.0_scaffold00126.48		Carubv10004792m		evm.model.supercontig_37.22		mrna18411.1-v1.0-hybrid		Pp3c2_2880V3.7.p		GSVIVT01011853001		Solyc06g007190.2.1		AL4G23940.t1		orange1.1g012288m		Potri.019G103100.8.p
evm_27.model.AmTr_v1.0_scaffold00146.58		Carubv10009317m		evm.model.supercontig_65.55		mrna31546.1-v1.0-hybrid		Pp3c2_2880V3.6.p		GSVIVT01009518001		Solyc05g052520.2.1		AL8G35470.t1		orange1.1g012769m		Potri.019G054200.5.p
evm_27.model.AmTr_v1.0_scaffold00044.247		Carubv10023353m		evm.model.supercontig_49.4		mrna03691.1-v1.0-hybrid		Pp3c2_2880V3.5.p		GSVIVT01016816001		Solyc05g052980.2.1		AL1G17820.t1		orange1.1g014756m		Potri.019G054200.3.p
evm_27.model.AmTr_v1.0_scaffold00038.131		Carubv10009150m		evm.model.supercontig_25.85		mrna09084.1-v1.0-hybrid		Pp3c2_2880V3.4.p		GSVIVT01035420001		Solyc06g076400.2.1		AL4G23420.t1		orange1.1g015832m		Potri.013G085500.1.p
evm_27.model.AmTr_v1.0_scaffold00017.291		Carubv10024530m		evm.model.supercontig_7.147		mrna01183.1-v1.0-hybrid		Pp3c2_2880V3.3.p		GSVIVT01015156001		Solyc03g096670.2.1		AL6G11630.t1		orange1.1g017866m		Potri.001G473300.2.p
evm_27.model.AmTr_v1.0_scaffold00025.147		Carubv10026477m		evm.model.supercontig_3.450		mrna07500.1-v1.0-hybrid		Pp3c2_2880V3.2.p		GSVIVT01008355001		Solyc06g076100.2.1		AL3G20570.t1		orange1.1g036852m		Potri.001G473300.1.p
evm_27.model.AmTr_v1.0_scaffold00183.21		Carubv10013886m		evm.model.supercontig_33.38		mrna15427.1-v1.0-hybrid		Pp3c2_2880V3.1.p		GSVIVT01009035001		Solyc09g010780.2.1		AL1G19620.t1		orange1.1g015135m		Potri.004G066200.5.p
evm_27.model.AmTr_v1.0_scaffold00122.48		Carubv10008517m		evm.model.supercontig_16.68		mrna12691.1-v1.0-hybrid		Pp3c9_10970V3.3.p		GSVIVT01004849001		Solyc10g086490.1.1		AL2G27270.t1		orange1.1g005316m		Potri.004G066200.4.p
evm_27.model.AmTr_v1.0_scaffold00065.64		Carubv10023040m		evm.model.supercontig_83.74		mrna03578.1-v1.0-hybrid		Pp3c9_10970V3.2.p		GSVIVT01038792001		Solyc01g100110.2.1		AL1G53550.t1		orange1.1g005756m		Potri.001G278500.1.p
evm_27.model.AmTr_v1.0_scaffold00044.135		Carubv10000370m		evm.model.supercontig_148.21		mrna09435.1-v1.0-hybrid		Pp3c9_10970V3.1.p		GSVIVT01009984001		Solyc05g009070.2.1		AL1G29860.t1		orange1.1g007964m		Potri.009G073000.1.p
evm_27.model.AmTr_v1.0_scaffold00051.41		Carubv10013141m		evm.model.supercontig_10.55		mrna30029.1-v1.0-hybrid		Pp3c11_11910V3.3.p		GSVIVT01017639001		Solyc04g079120.2.1		AL2G32450.t1		orange1.1g002806m		Potri.010G187000.1.p
evm_27.model.AmTr_v1.0_scaffold00045.171		Carubv10009213m		evm.model.supercontig_46.81		mrna05004.1-v1.0-hybrid		Pp3c11_11910V3.2.p		GSVIVT01028192001		Solyc03g121880.2.1		AL1G29850.t1		orange1.1g014263m		Potri.016G030800.2.p
evm_27.model.AmTr_v1.0_scaffold00057.96		Carubv10020313m		evm.model.supercontig_2.366		mrna24519.1-v1.0-hybrid		Pp3c11_11910V3.1.p		GSVIVT01014301001		Solyc12g096020.1.1		AL8G32960.t1		orange1.1g014281m		Potri.016G030800.1.p
evm_27.model.AmTr_v1.0_scaffold00001.113		Carubv10009238m		evm.model.supercontig_6.361		mrna06075.1-v1.0-hybrid		Pp3c11_11910V3.4.p		GSVIVT01020581001		Solyc07g040990.2.1		AL7G26900.t1		orange1.1g045195m		Potri.008G070400.1.p
evm_27.model.AmTr_v1.0_scaffold00023.135		Carubv10009209m		evm.model.supercontig_576.1		mrna00994.1-v1.0-hybrid		Pp3c1_8190V3.3.p		GSVIVT01035977001		Solyc03g118890.2.1		AL1G30380.t1		orange1.1g018316m		Potri.009G037300.1.p
evm_27.model.AmTr_v1.0_scaffold00003.63		Carubv10009389m		evm.TU.contig_35224.1		mrna15002.1-v1.0-hybrid		Pp3c1_8190V3.5.p		GSVIVT01016046001		Solyc01g105280.2.1		AL1G35740.t1		orange1.1g009092m		Potri.001G245200.1.p
evm_27.model.AmTr_v1.0_scaffold00044.67		Carubv10020401m		evm.model.supercontig_48.122		mrna11716.1-v1.0-hybrid		Pp3c1_8190V3.4.p		GSVIVT01035778001		Solyc10g047290.1.1		AL1G49170.t1		orange1.1g009070m		Potri.001G245200.6.p
evm_27.model.AmTr_v1.0_scaffold00045.253		Carubv10020493m		evm.model.supercontig_50.146		mrna30824.1-v1.0-hybrid		Pp3c1_8190V3.1.p		GSVIVT01016485001		Solyc04g074190.2.1		AL2G38530.t1		orange1.1g009094m		Potri.010G199600.1.p
evm_27.model.AmTr_v1.0_scaffold00003.176		Carubv10026433m		evm.model.supercontig_1.296		mrna28191.1-v1.0-hybrid		Pp3c2_32860V3.4.p		GSVIVT01024641001		Solyc04g064500.2.1		AL1G51960.t1		orange1.1g009083m		Potri.008G059200.1.p
evm_27.model.AmTr_v1.0_scaffold00059.86		Carubv10004852m		evm.model.supercontig_20.105		mrna31511.1-v1.0-hybrid		Pp3c2_32860V3.3.p		GSVIVT01013399001		Solyc07g024020.1.1		AL1G54560.t1		orange1.1g008868m		Potri.009G030600.1.p
evm_27.model.AmTr_v1.0_scaffold00058.124		Carubv10009953m		evm.model.supercontig_9.48		mrna17330.1-v1.0-hybrid		Pp3c2_32860V3.2.p		GSVIVT01022296001		Solyc01g068000.2.1		AL3G30290.t1		orange1.1g008875m		Potri.001G239300.1.p
evm_27.model.AmTr_v1.0_scaffold00019.384		Carubv10009954m		evm.model.supercontig_85.65		mrna13029.1-v1.0-hybrid		Pp3c2_32860V3.1.p		GSVIVT01013178001		Solyc06g009390.2.1		AL2G26570.t1		orange1.1g008890m		Potri.006G085000.1.p
evm_27.model.AmTr_v1.0_scaffold00086.102		Carubv10009950m		evm.model.supercontig_6.56		mrna10726.1-v1.0-hybrid		Pp3c1_8190V3.2.p		GSVIVT01025802001		Solyc01g080400.2.1		AL3G17160.t1		orange1.1g008880m		Potri.005G021200.2.p
evm_27.model.AmTr_v1.0_scaffold00309.1		Carubv10009947m		evm.model.supercontig_200.4		mrna17615.1-v1.0-hybrid		Pp3c3_5010V3.3.p		GSVIVT01031155001		Solyc07g062970.2.1		AL3G53710.t1		orange1.1g019889m		Potri.005G021200.1.p
		Carubv10009459m		evm.model.supercontig_80.89		mrna22286.1-v1.0-hybrid		Pp3c3_5010V3.1.p		GSVIVT01035094001		Solyc07g053760.2.1		AL7G24170.t1		orange1.1g020355m		Potri.013G011600.2.p
		Carubv10009425m		evm.model.supercontig_16.166		mrna31538.1-v1.0-hybrid		Pp3c3_5010V3.2.p		GSVIVT01032637001		Solyc08g006060.2.1		AL4G16200.t1		orange1.1g020944m		Potri.008G123600.6.p
		Carubv10013776m		evm.model.supercontig_64.64		mrna07068.1-v1.0-hybrid		Pp3c13_7440V3.2.p		GSVIVT01025572001		Solyc12g042570.1.1		AL7G20120.t1		orange1.1g023412m		Potri.008G123600.5.p
		Carubv10021462m		evm.model.supercontig_158.2		mrna23343.1-v1.0-hybrid		Pp3c13_7440V3.4.p		GSVIVT01023994001		Solyc06g065610.2.1		AL4G17090.t1		orange1.1g026595m		Potri.008G123600.4.p
		Carubv10014084m		evm.model.supercontig_3.103		mrna23726.1-v1.0-hybrid		Pp3c13_7440V3.5.p		GSVIVT01034979001		Solyc04g082600.2.1		AL3G22940.t1		orange1.1g025554m		Potri.008G123600.7.p
		Carubv10014347m		evm.model.supercontig_40.22		mrna18114.1-v1.0-hybrid		Pp3c13_7440V3.1.p		GSVIVT01033496001		Solyc00g007190.2.1		AL4G25000.t1		orange1.1g021191m		Potri.008G123600.8.p
		Carubv10014320m		evm.model.supercontig_5.245		mrna14545.1-v1.0-hybrid		Pp3c13_7440V3.3.p		GSVIVT01037875001		Solyc02g082490.2.1		AL4G29370.t1		orange1.1g045213m		Potri.010G121600.1.p
		Carubv10023514m				mrna05093.1-v1.0-hybrid		Pp3c3_5010V3.5.p		GSVIVT01000159001		Solyc08g007000.2.1		AL5G31910.t1		orange1.1g015767m		Potri.010G121600.3.p
		Carubv10005121m				mrna22744.1-v1.0-hybrid		Pp3c3_5010V3.4.p		GSVIVT01017754001		Solyc08g077150.2.1		AL4G31400.t1		orange1.1g015745m		Potri.014G031500.1.p
		Carubv10005486m				mrna23991.1-v1.0-hybrid		Pp3c2_4410V3.2.p		GSVIVT01001129001		Solyc01g056690.2.1		AL4G46390.t1		orange1.1g014607m		Potri.014G031200.2.p
		Carubv10023391m				mrna22627.1-v1.0-hybrid		Pp3c2_4410V3.1.p		GSVIVT01006890001		Solyc01g100040.2.1		AL4G37900.t1		orange1.1g014752m		Potri.014G031200.1.p
		Carubv10023372m				mrna06881.1-v1.0-hybrid		Pp3c13_14120V3.6.p		GSVIVT01009374001		Solyc01g065700.2.1		AL3G16290.t1		orange1.1g014765m		Potri.002G127300.1.p
		Carubv10022759m				mrna15114.1-v1.0-hybrid		Pp3c13_14120V3.5.p		GSVIVT01019004001		Solyc09g007080.2.1		AL6G38980.t1		orange1.1g018909m		Potri.002G127300.3.p
		Carubv10022621m				mrna29560.1-v1.0-hybrid		Pp3c13_14120V3.4.p		GSVIVT01009670001		Solyc10g084410.1.1		AL3G29720.t1		orange1.1g023327m		Potri.004G066200.6.p
		Carubv10023725m				mrna14983.1-v1.0-hybrid		Pp3c13_14120V3.3.p		GSVIVT01038572001		Solyc01g111730.2.1		AL3G24290.t1		orange1.1g025291m		Potri.004G066200.7.p
		Carubv10023439m				mrna13094.1-v1.0-hybrid		Pp3c13_14120V3.2.p		GSVIVT01036034001		Solyc03g033340.2.1		AL5G36170.t1		orange1.1g025288m		Potri.003G044200.1.p
		Carubv10023437m						Pp3c13_14120V3.1.p		GSVIVT01028710001		Solyc02g083420.2.1		AL5G31810.t1		orange1.1g023418m		Potri.006G224600.1.p
		Carubv10019042m						Pp3c13_14120V3.7.p				Solyc10g055650.1.1		AL7G10390.t1		orange1.1g023551m		Potri.006G224600.2.p
		Carubv10025058m						Pp3c3_17780V3.3.p				Solyc06g065920.2.1		AL6G12010.t1		orange1.1g017998m		Potri.018G060300.2.p
		Carubv10022673m						Pp3c3_17780V3.2.p				Solyc12g099600.1.1		AL8G45520.t1		orange1.1g018038m		Potri.015G043000.1.p
		Carubv10013967m						Pp3c3_17780V3.1.p				Solyc10g049630.1.1		AL3G30070.t1		orange1.1g018032m		Potri.015G043000.2.p
		Carubv10003011m						Pp3c3_17780V3.4.p				Solyc02g092750.2.1		AL6G16860.t1		orange1.1g018021m		Potri.002G097200.3.p
		Carubv10014246m						Pp3c4_17160V3.4.p				Solyc05g053290.2.1		AL3G27650.t1		orange1.1g024574m		Potri.002G097200.2.p
		Carubv10014078m						Pp3c4_17160V3.3.p				Solyc09g065650.2.1		AL3G29420.t1		orange1.1g024644m		Potri.005G164600.2.p
		Carubv10013921m						Pp3c4_17160V3.1.p				Solyc12g089090.1.1		AL3G38020.t1		orange1.1g024992m		Potri.005G164600.1.p
		Carubv10018907m						Pp3c4_17160V3.8.p				Solyc04g080090.2.1		AL7G17510.t1		orange1.1g025009m		Potri.008G209000.1.p
		Carubv10017436m						Pp3c4_17160V3.2.p				Solyc03g082960.2.1		AL5G45010.t1		orange1.1g024988m		Potri.005G186000.1.p
		Carubv10004984m						Pp3c4_17160V3.7.p				Solyc12g096520.1.1		AL5G46180.t1		orange1.1g025030m		Potri.002G074500.1.p
		Carubv10005266m						Pp3c4_17160V3.6.p				Solyc08g074230.1.1		AL6G45180.t1		orange1.1g016914m		Potri.008G209000.2.p
		Carubv10005265m						Pp3c4_17160V3.5.p				Solyc10g078820.1.1		AL7G38190.t1		orange1.1g016858m		Potri.005G186000.3.p
		Carubv10013927m						Pp3c4_23550V3.4.p				Solyc10g078800.1.1		AL8G44750.t1		orange1.1g023095m		Potri.002G074500.2.p
		Carubv10001132m						Pp3c4_23550V3.3.p				Solyc03g007270.2.1		AL7G24840.t1		orange1.1g023123m		Potri.010G151500.1.p
		Carubv10001322m						Pp3c4_23550V3.6.p						AL7G20260.t1		orange1.1g025066m		Potri.008G100700.1.p
		Carubv10005039m						Pp3c3_31091V3.1.p						AL6G36610.t1		orange1.1g016743m		Potri.008G100700.5.p
		Carubv10013319m						Pp3c3_31080V3.1.p						AL6G21290.t1		orange1.1g021475m		Potri.014G115500.1.p
		Carubv10015964m						Pp3c8_5420V3.1.p						AL7G18740.t1		orange1.1g016684m		Potri.008G100700.4.p
		Carubv10017629m						Pp3c8_5420V3.2.p						AL7G18040.t1		orange1.1g021216m		Potri.008G100700.6.p
		Carubv10017472m												AL6G10350.t1		orange1.1g042247m		Potri.010G047600.1.p
		Carubv10017478m												AL6G38000.t1		orange1.1g004401m		Potri.010G028300.2.p
		Carubv10018471m												AL8G26050.t1		orange1.1g002536m		Potri.008G198700.1.p
		Carubv10003214m												AL8G27790.t1		orange1.1g004274m		Potri.017G013300.2.p
		Carubv10004725m												AL48U10090.t1		orange1.1g004398m		Potri.001G398100.1.p
		Carubv10026491m														orange1.1g004391m		Potri.011G116700.4.p
		Carubv10005771m														orange1.1g017682m		Potri.011G116700.1.p
		Carubv10005299m														orange1.1g015633m		Potri.006G265100.1.p
		Carubv10005302m														orange1.1g022493m		Potri.003G183800.1.p
		Carubv10005511m														orange1.1g015993m		Potri.001G043000.2.p
		Carubv10001244m														orange1.1g015989m		Potri.018G017800.1.p
		Carubv10003645m														orange1.1g017598m		Potri.018G033000.1.p
		Carubv10001617m														orange1.1g015864m		Potri.006G248400.1.p
		Carubv10005231m														orange1.1g015823m		Potri.001G282500.2.p
		Carubv10004154m														orange1.1g020446m		Potri.001G282500.1.p
		Carubv10001181m														orange1.1g020579m		Potri.005G253700.1.p
		Carubv10003772m														orange1.1g016380m		Potri.002G007500.1.p
		Carubv10028020m														orange1.1g016819m		Potri.005G102500.1.p
		Carubv10026478m														orange1.1g016790m		Potri.007G058700.1.p
		Carubv10005006m														orange1.1g016733m		Potri.007G058700.2.p
																orange1.1g017197m		Potri.003G089500.2.p
																orange1.1g025321m		Potri.001G144700.1.p
																orange1.1g025349m		Potri.002G185000.1.p
																orange1.1g025334m		Potri.014G110500.1.p
																orange1.1g010163m		Potri.002G185000.3.p
																orange1.1g010180m		Potri.014G110500.5.p
																orange1.1g010174m		Potri.013G012200.2.p
																orange1.1g010155m		Potri.005G021900.1.p
																orange1.1g010165m		Potri.010G009200.1.p
																orange1.1g010152m		Potri.010G006200.1.p
																orange1.1g010167m		Potri.010G006100.2.p
																orange1.1g010171m		Potri.010G006100.1.p
																orange1.1g015410m		Potri.010G028300.3.p
																orange1.1g026570m		Potri.008G046900.3.p
																orange1.1g026568m		Potri.008G046900.2.p
																orange1.1g022410m		Potri.008G046900.4.p
																orange1.1g010549m		Potri.010G214700.7.p
																orange1.1g010558m		Potri.010G214700.6.p
																orange1.1g010417m		Potri.010G214700.2.p
																orange1.1g013301m		Potri.008G046900.5.p
																orange1.1g018841m		Potri.008G046900.1.p
																orange1.1g018392m		Potri.010G214700.1.p
																orange1.1g017430m		Potri.010G214700.5.p
																orange1.1g018030m		Potri.010G214700.4.p
																orange1.1g017079m		Potri.005G108500.1.p
																orange1.1g018645m		Potri.004G177100.1.p
																orange1.1g026310m		Potri.009G137400.1.p
																orange1.1g022745m		Potri.016G082800.1.p
																orange1.1g022796m		Potri.007G061100.1.p
																orange1.1g021337m		Potri.007G061100.2.p
																orange1.1g022925m		Potri.010G214700.3.p
																orange1.1g020272m		Potri.008G104300.1.p
																orange1.1g027184m		Potri.010G146700.1.p
																orange1.1g020117m		Potri.010G146700.2.p
																orange1.1g045692m		Potri.016G045600.1.p
																orange1.1g013591m		Potri.010G146700.4.p
																orange1.1g018672m		Potri.010G146700.3.p
																orange1.1g024279m		Potri.006G192600.1.p
																orange1.1g026864m		Potri.006G192600.2.p
																		Potri.001G297200.1.p
																		Potri.009G091600.1.p
																		Potri.008G207700.2.p
																		Potri.010G024800.1.p
																		Potri.010G024800.2.p
																		Potri.003G159600.1.p
																		Potri.007G051900.1.p
																		Potri.002G190400.1.p
																		Potri.005G214700.3.p
																		Potri.014G042800.1.p
																		Potri.007G028900.2.p
																		Potri.007G028900.1.p
																		Potri.005G125700.2.p
																		Potri.005G125700.1.p
																		Potri.015G010600.2.p
																		Potri.006G267600.4.p
																		Potri.006G267600.1.p
																		Potri.018G013900.1.p
																		Potri.018G013900.2.p
																		Potri.010G091500.1.p
																		Potri.012G131800.1.p
																		Potri.015G133900.5.p
																		Potri.015G019200.12.p
																		Potri.015G019200.1.p
																		Potri.012G002100.13.p
																		Potri.012G002100.12.p
																		Potri.012G002100.2.p
																		Potri.015G019200.4.p
